# Genetic footprint of population fragmentation and contemporary collapse in a freshwater cetacean

Minmin Chen<sup>1,2†</sup>, Michael C. Fontaine<sup>3†\*</sup>, Yacine Ben Chehida<sup>3†</sup>, Jinsong Zheng<sup>1\*</sup>, Frédéric Labbé<sup>3,4,5</sup>, Zhigang Mei<sup>1</sup>, Yujiang Hao<sup>1</sup>, Kexiong Wang<sup>1</sup>, Min Wu<sup>1</sup>, Qingzhong Zhao<sup>1</sup>, Ding Wang<sup>1\*</sup>

<sup>1</sup> The Key Laboratory of Aquatic Biodiversity and Conservation of Chinese Academy of Sciences, Institute of Hydrobiology of Chinese Academy of Sciences, Wuhan 430072, China;

<sup>2</sup> Research Center of Aquatic Organism Conservation and Water Ecosystem Restoration in Anhui Province, College of Life Science, Anqing Normal University, Anqing 246133, China

<sup>3</sup> Groningen Institute for Evolutionary Life Sciences (GELIFES), University of Groningen, PO Box 11103 CC, Groningen, The Netherlands;

<sup>4</sup> Eck Institute for Global Health, University of Notre Dame, Notre Dame, IN 46556, USA

<sup>5</sup> Department of Biological Sciences, University of Notre Dame, Galvin Life Sciences Center, Notre Dame, IN 46556, USA

<sup>†</sup> These authors contributed equally and should be considered as co-first authors.

\* Corresponding authors: Michael C. Fontaine ([mikafontaine@gmail.com](mailto:mikafontaine@gmail.com));

Ding Wang ([wangd@ihb.ac.cn](mailto:wangd@ihb.ac.cn)); Jinsong Zheng ([zhengjinsong@ihb.ac.cn](mailto:zhengjinsong@ihb.ac.cn))

**Running title:** Genetics of the Yangtze Finless Porpoise

**Keywords:** demographic collapse; extinction dynamics; river dolphin; river connectivity; gene flow; Approximate Bayesian Computation; Yangtze Finless Porpoise; *Neophocaena asiaeorientalis*; baiji; *Lipotes vexillifer*

31

## Abstract

32

33 Understanding demographic trends and patterns of gene flow in an endangered species is  
34 crucial for devising conservation strategies. Here, we examined the extent of population  
35 structure and recent evolution of the critically endangered Yangtze finless porpoise  
36 (*Neophocaena asiaeorientalis asiaeorientalis*). By analysing genetic variation at the  
37 mitochondrial and nuclear microsatellite loci for 148 individuals, we identified three  
38 populations along the Yangtze River, each one connected to a group of admixed ancestry.  
39 Each population displayed extremely low genetic diversity, consistent with extremely small  
40 effective size ( $\leq 92$  individuals). Habitat degradation and distribution gaps correlated with  
41 highly asymmetric gene-flow that was inefficient in maintaining connectivity between  
42 populations. Genetic inferences of historical demography revealed that the populations in the  
43 Yangtze descended from a small number of founders colonizing the river from the sea during  
44 the last Ice Age. The colonization was followed by a rapid population split during the last  
45 millennium predating the Chinese Modern Economy Development. However, genetic diversity  
46 showed a clear footprint of population contraction over the last 50 years leaving only  $\sim 2\%$  of  
47 the pre-collapsed size, consistent with the population collapses reported from field studies.  
48 This genetic perspective provides background information for devising mitigation strategies to  
49 prevent this species from extinction.

50

51

## Introduction

52

53         Dispersal and gene flow in a meta-population maintain local demographic and genetic  
54 variation, thus increasing the probability of species persistence<sup>1,2</sup>. Persistence of wide-ranging  
55 animals occupying fragmented landscapes depends on the matrix quality of the habitat and  
56 the ability of individuals to move among habitat patches<sup>3</sup>, and corridors facilitating this  
57 movement across such landscape<sup>4-6</sup>. Along the Yangtze River (China, Fig. 1), anthropogenic  
58 activities of the past 50 years have put intense pressure on the freshwater ecosystem leading  
59 to habitat degradation, species range fragmentation and extinction of some emblematic  
60 endemic species, such as the Yangtze River dolphin or baiji (*Lipotes vexillifer*)<sup>7</sup>. Today, the  
61 Yangtze finless porpoise (*Neophocaena asiaeorientalis asiaeorientalis* or YFP) has become the  
62 only surviving freshwater cetacean now found in China and the world's only freshwater  
63 porpoise species<sup>8</sup>.

64         Endemic to the Yangtze River drainage (Fig. 1), the YFP is now primarily restricted to the  
65 middle-lower Yangtze Channel and two large appended lakes: Dongting Lake (DT) and Poyang  
66 Lake (PY)<sup>9</sup>. The subspecies has occasionally been reported from some of the larger adjacent  
67 tributaries though this is now rare<sup>10-12</sup>. The amount of river and lake habitat available to this  
68 subspecies is relatively small compared to that available to marine populations of finless  
69 porpoises, which occur in coastal waters from Japan to the Arabian Sea<sup>8</sup>. However, YFP  
70 abundance has suffered from dramatic reductions from 2,500 individuals in 1991<sup>10</sup> to 1,800 in  
71 the end of 2006, as estimated by the Yangtze Freshwater Dolphin Expedition in 2006  
72 (YFDE2006)<sup>13</sup>. More recent surveys conducted during the Yangtze Freshwater Dolphin  
73 Expedition conducted in 2012 (YFDE2012) reported that populations declined even further to  
74 ~1,040 individuals, including ~500 porpoises in the Yangtze main stream, ~450 in PY and ~90  
75 in DT<sup>14</sup>. With such rapid range contraction, Mei *et al.*<sup>15</sup> estimated that the YFP may become  
76 extinct within the next 60 years or less<sup>14</sup>. The YFP was thus recently reclassified as a Critically  
77 Endangered sub-species on the IUCN Red List<sup>9</sup>. As a top predator, the survival of the finless  
78 porpoise depends heavily on habitat suitability, food availability and maintenance of corridors  
79 allowing dispersal between populations. However, with increasing underwater noise from  
80 boat traffic and incidental catches in fisheries, food and habitat resources for the species have  
81 become increasingly scattered and fragmented, and corridors across the landscape have been

82 compromised by the booming of the Chinese economy over the last decades<sup>13</sup>. Despite these  
83 imminent threats, we still do not know how reduction in suitable habitats in the Yangtze River  
84 has reduced the number of breeding porpoises and how habitat fragmentation has impacted  
85 connectivity between populations and the population structure itself. This information is  
86 extremely difficult to quantify using direct observations. On the other hand, population  
87 genetic approaches can provide key insights about the current population structure and  
88 connectivity and historical population demography by leaving detectable footprints on the  
89 genetic diversity and its geographic structure<sup>16,17</sup>.

90

91 Previous phylogeographic analyses based on the non-coding mitochondrial Control  
92 Region (mtDNA-CR) of the finless porpoises from Chinese and Japanese waters documented  
93 evidence of a demographic expansion following the Last Glacial Maximum (LGM, ~24,000 yrs  
94 BP) and the colonization of Yangtze River from the Yellow Sea ~22,000 yrs BP ago<sup>18,19</sup>. A  
95 subsequent study within the Yangtze River by Chen et al.<sup>20</sup> used mtDNA-CR and nuclear  
96 microsatellite loci and revealed evidence of genetic subdivisions within the YFP populations  
97 suggestive of population fragmentation. However, the fine scale population structure  
98 remained unclear and the processes shaping the genetic variation in the YFP unknown.  
99 Changes in connectivity between populations, dynamics of population expansion-contraction  
100 and demographic history are potent factors shaping the genetic variation in the YFP, but these  
101 were not investigated in further details so far.

102

103 In this study, we address these above questions by re-analysing the previously published  
104 data set of Chen et al.<sup>20</sup> that combined fast evolving microsatellite loci together with more  
105 slowly evolving sequences from the mtDNA-CR. Specifically, in contrast with previous studies,  
106 we used a statistical population genetic framework in order to (i) resolve the fine-scale  
107 population structure using a combination of individual-based multivariate and Bayesian  
108 clustering approaches designed for weak genetic structure when it exists; (ii) estimate past  
109 and contemporaneous effective population sizes and connectivity among populations; and (iii)  
110 reconstruct the demographic history best fitting with the genetic diversity observed in the  
111 populations of the YFP using a quantitative model-based inferential population genetic  
112 framework relying on Approximate Bayesian Computation (ABC) approaches<sup>16,17,21-23</sup>.  
113 Determining and quantifying to which extent populations in the YFP are fragmenting, losing

114 connectivity, and the magnitudes of the demographic trends are critical knowledge for  
115 designing conservation and management plans. For example, we still do not understand  
116 whether population fragmentation and decline have been triggered only recently by human  
117 activities during the past 50 years or if these patterns were initiated earlier by more  
118 long-term ecological and evolutionary processes and exacerbated lately during the  
119 Anthropocene.

120

121

122

## Results

123

124 **Genetic structure and diversity of the Yangtze finless porpoises.** The final data set consisted of  
125 148 individuals sampled along the Yangtze River and the two main lakes (Dongting Lake (DT)  
126 and Poyang Lake (PY), Fig. 1) genotyped for 11 microsatellite loci and sequenced for a 597  
127 base-pairs fragment of the hyper-variable region 1 (see Table 1 and materials and methods).  
128 The clustering of the microsatellite data using the Bayesian clustering algorithm of  
129 *STRUCTURE*<sup>24-26</sup> provided consistent results over 10 replicated runs performed for each  
130 number  $K$  of cluster tested (Fig. 2a). The probability of the data greatly increased when two  
131 genetic clusters were modelled instead of one and showed the highest values on average  
132 over 10 replicates (Fig. S1). At  $K>2$ , the increase in probability decreased in average; however  
133 some runs displayed the highest probability of all runs at  $K=3$  and 4 (Fig. S1). A visual  
134 inspection of the individual clustering for each  $K$  value (Fig. 2a) revealed that porpoises from  
135 the PY split from the other individuals of the Yangtze river at  $K=2$ , suggesting that these  
136 porpoises are highly differentiated from the others. When higher  $K$  values were tested ( $K=3$   
137 and 4) porpoises from PY, XCSS and TL localities were all identified as differentiated genetic  
138 units, while the porpoises from the in-between regions consisted of an admixed group  
139 sharing genetic ancestry with the three other populations (Fig. 2a and 2d). The three  
140 individuals at the mouth of the Yangtze River close to Shanghai city (SH) also seemed to  
141 depart from the other groups at  $K=4$ , but the low sample size ( $n=3$ ) preclude any definitive  
142 conclusions. No further subdivision was observed beyond  $K=4$  (result not shown).

143

144

145 The results from *STRUCTURE* were further validated using two multivariate approaches that  
146 do not rely on model assumptions<sup>27</sup>: a Discriminant Analysis of Principal Components  
147 (*DAPC*)<sup>28</sup> and a Principal Component Analysis (PCA)<sup>27,29</sup>. Both methods showed a genetic  
148 structure consistent with the results of *STRUCTURE* (Fig. 2b, 2c and Fig. S2). The *DAPC*  
149 provided a clear-cut discrimination of the four groups identify by *STRUCTURE* (Fig. 2c). The  
150 first discriminant function (DF) discriminated XCSS and PY and the second DF TL and SH. The  
151 other porpoises recognized as admixed in *STRUCTURE* were located at the intersection of the  
152 four other groups. The proportions of successful reassignment (based on the discriminant  
153 functions) of individuals to their original clusters was high (Fig. 2b): 100% for XCSS and SH,  
154 94.8% for PY, 94.1% for TL, and 94.3% for the admixed porpoises. These large values indicate  
155 clear-cut clusters. Finally, the PCA provided a similar picture as the *DAPC* and *STRUCTURE*, but  
156 with more overlap among the groups (Fig. S2).

157

158 None of the identified populations displayed significant departures from Hardy–Weinberg  
159 expectations as shown by the  $F_{IS}$  values (Table 1). Porpoises from the admixed and TL groups  
160 showed the highest level of microsatellite genetic diversities and XCSS and PY the lowest, as  
161 estimated with the values of allelic richness ( $A_r$ ), private allelic richness ( $pA$ ) and expected  
162 heterozygosity ( $H_e$ ) (Table 1 and Fig. S3). Only the two extremes groups, PY and Admix,  
163 showed a significant difference in  $A_r$  and  $H_e$  (Wilcoxon signed-ranked test  $p$ -value  $< 0.05$ ). The  
164 mitochondrial genetic diversity followed a similar trend with the admixed group showing the  
165 highest haplotype and nucleotide diversity followed by TL and PY (Table 1 and Fig. 2d). We  
166 found only one haplotype fixed in the XCSS group.

167

168 All populations showed significant differences in allelic frequencies for the microsatellite loci  
169 with  $F_{ST}$  values ranging from 0.023 to 0.070 (Table 2). Notably  $F_{ST}$  values between XCSS, PY  
170 and TL were relatively high ( $>0.05$ ), while  $F_{ST}$  values were intermediate between the Admix  
171 group and each distinct population (between 0.02 and 0.03, Table 2). For the mitochondrial  
172 locus (Table 2),  $F_{ST}$  values were all significant except one (Admix vs. TL), and were especially  
173 strong between XCSS and all other groups, due to the fact that one haplotype is fixed in this  
174 population (Fig. 2d).

175

176

177 **Contemporary effective population sizes and migration rates.** We used two methods for  
178 estimating contemporary effective population size ( $N_e$ ) in each population from the  
179 microsatellite data: *NeEstimator*<sup>30</sup> based on linkage disequilibrium among loci within  
180 population and *ONESAMP*<sup>31</sup> relying on an Approximate Bayesian Computation (ABC) approach.  
181 Both approaches provided comparable estimates of  $N_e$  for each population (Fig. 3 and Table  
182 3). All estimated values were very low (<92 individuals), with the Admix and PY groups  
183 displaying the highest estimates, followed by TL and XCSS.

184

185 We estimated migration rates ( $m$ ) between pairs of groups over the last few generations using  
186 *BayesAss*<sup>32</sup>. Out of the 12 repeat runs, 10 showed good mixing properties with Bayesian  
187 Deviance values<sup>33</sup> close to each other (mean  $\pm$  SD: 8,915.28  $\pm$  0.33) and convergent estimates  
188 for each parameter (see the material and methods). We thus combined them all to estimate  
189 the parameter values (Table S2). The number of effective migrants ( $N_e \times m$ ) per generation  
190 over the last generations were obtained by combining  $N_e$  estimates from *ONESAMP*<sup>31</sup> with  $m$   
191 estimates of *BayesAss*<sup>32</sup> (Fig. 3). The three populations – TL, XCSS and PY – did not show any  
192 evidence of recent migration among each other, as indicated by the lower bound of the 95%  
193 highest probability density intervals (HPD) interval equal to 0 (Fig. 3 and Table S1). However,  
194 each one is connected to the Admix group with highly asymmetric gene flow. We detected  
195 significant unidirectional gene flow from PY to Admix and from Admix to TL and XCSS.  
196 Estimated  $N_e \times m$  values from the Admix group to TL or XCSS are about the half of those from  
197 PY to the Admix group.

198

199 **Population demographic history.** Departure of the allelic or haplotypic frequency spectrum of  
200 microsatellite and mtDNA loci, respectively, from those expected under a scenario of constant  
201 population size can provide evidence of population size change. For microsatellite loci, we  
202 used the Garza and Williamson  $M_{GW}$  ratio of the number of alleles to the range in allele size to  
203 detect evidence of population size contraction<sup>34</sup>. Genetic diversity at the microsatellite  
204 markers showed significant evidence of  $N_e$  contraction in each population, as suggested by  
205 the very small ratio values of the  $M_{GW}$  statistic (Table 1). The  $M_{GW}$  value estimated in each  
206 population was significantly smaller than expected under the assumption of constant  
207 population size (Table 1). In contrast, the Tajima's  $D$ <sup>35</sup> values (Table 1) estimated from the  
208 mtDNA-CR sequences in each population did not show any significant departure from the

209 constant population size hypothesis.

210

211 We investigated further the demographic history best fitting with the genetic diversity of the  
212 combined microsatellite and mtDNA markers observed in the three distinct populations of  
213 the YFP using a coalescent-based ABC approach<sup>22</sup>. See the material and methods, appendix  
214 S1, Fig. S4, Table S2 and S3 for further details on the methodology. The first step in the ABC  
215 analysis was to identify the population branching order that best fit with the data. Out of the  
216 10 scenarios tested (Fig. 4a), the ABC analysis showed that the trichotomy (SC1), which  
217 assumes that XCSS, PY and TL populations diverged at the same time, received the highest  
218 support. Indeed, the two distinct model choice approaches – a “standard” model choice  
219 procedure relying a logistic regression of Linear Discriminant Analysis (ABC-LDA) on the  
220 summary statistics<sup>36</sup> and the recently developed Random Forest machine learning  
221 classification approach<sup>37,38</sup> (ABC-RF) – identify this scenario SC1 as the best one with a  
222 posterior probability respectively of 66.7% with a 95%CI not overlapping with any other  
223 scenarios and  $55.8 \pm 2.5\%$  (Fig. S5a and Table S4). This contrasted with the nine other models  
224 where the posterior probabilities estimated using the ABC-LDA were each lower than 8%. The  
225 simulation-based performance analysis of this ABC step (Table S4, S5 and Fig. S5) shows that  
226 61.4% of the simulated dataset under this SC1 were correctly identified using the ABC-LDA  
227 procedure, leading to an average Type-I error rate (false negative) of 4.3% ranging from 1.7%  
228 to 9.7% and a total prior error rate (*i.e.* the average misclassification error)<sup>37,38</sup> of 38.6% (62.9%  
229 using the ABC-RF). Simulations under the nine other competing scenarios led to a Type-II  
230 error rate of <12.9% incorrect assignment to SC1 (false positives) and a power (87.1%) to  
231 discriminate the best scenario from the others (Table S4).

232

233 The second ABC step tested for occurrence of simple changes in effective population size ( $N_e$ )  
234 during the divergence of the three populations under six nested competing scenarios (Fig. 4bi,  
235 Table S2 and S3). The scenario assuming a bottleneck in the ancestral population prior to  
236 population split (SC3) outcompeted the other five scenarios (*i.e.*, no change (SC1) or simple  
237 decline or expansion in the ancestral or daughter populations, SC2, SC4-6), with a probability  
238 of 78% and no overlap in 95%CI for the ABC-LDA, and  $69.8 \pm 1.9\%$  under the ABC-RF (Fig. 4bi  
239 and Table S6). The sensitivity analysis showed that simulations generated with SC3 were more  
240 difficult to identify, with an average Type-I error rate of 12.4% (ranging between 1 and 21%



241 error, depending on the scenario), and a total prior error rate of 62.7% under the ABC-LDA  
242 and 41.4% under the ABC-RF (Fig. S6 and Table S6). Nevertheless, the Type-II error rate (false  
243 positive) was only 7.2% and the power to discriminate this scenario from the others was  
244 92.8%. Furthermore, the assessment of goodness-of-fit of this bottleneck scenario (SC3) to  
245 the data showed very good performance, as the simulations using this scenario and posterior  
246 distributions for each parameter, were able to reproduce all but one observed summary  
247 statistic, in contrast to all other scenarios (Table S6 and S7).

248

249 The final step (Fig. 4bii, Table S2 and S3) tested whether a recent demographic collapse in  
250 each population within the last 5 generations (or 50 years as reported in the literature<sup>15</sup>)  
251 could have produced a detectable genetic footprint. The scenario involving a recent collapse  
252 (SC2) in each population received a significantly higher probability (ABC-LDA 78.2%; ABC-RF:  
253  $69.2 \pm 2.0\%$ ) compared with the alternative scenario of constant  $N_e$  since the population split  
254 (Fig. 4bii, Fig. S6, Table S8, and S9). Both Type-I and Type-II error rates were <16% indicating  
255 adequate power and sensitivity of our ABC analysis.

256

257 The model parameters estimated under the final best demographic scenario (SC2 in Fig. 4bii,  
258 Table S10 and S11) suggest that the ancestral population would have been large ( $N_{anc2} =$   
259 18,700 individuals; 95%CI: [3,480 – 19,700]), and that a small fraction would have founded  
260 the Yangtze River populations  $\sim 3,400$  95%CI: [1300 – 41,000] years ago ( $T_{exp2}$ ) and expanded  
261 to reach an effective size of about 5,660 individuals ( $N_{exp2}$ ; 95%CI: [2,900 – 9,840]). The three  
262 daughter populations would have then split from each other  $\sim 1,030$  years ago ( $T_{isol2}$ ; 95%CI:  
263 [214 – 4,380]), and reached an effective size of about 2,000 individuals after their split. Each  
264 of these daughter populations would have gone through a significant decline leaving less than  
265 2% of their pre-collapse size during the last 50 years (see Table 3, S10, and S11).

266

267

## 268 Discussion

269

270 Our study shows that the present-day genetic diversity of finless porpoise in the Yangtze  
271 River (YFP) has been strongly influenced by an initial founder event that took place several

272 thousand years ago, followed by a relatively recent split into 3 populations (XCSS, TL, PY), and  
273 a recent demographic collapse within the last 50 years. Indeed, consistent with previous  
274 studies<sup>18,19</sup>, the ABC genetic inferences showed that a few individuals coming from a large  
275 ancestral population, likely a marine population of *Neophocaena asiaeorientalis sunameri* in  
276 the Yellow Sea, colonized the Yangtze River within the last 41kyrs, and most likely during the  
277 Last Ice Age. The subsequent population split into three populations occurred between 200  
278 and 5,000 years BP. This suggests that the population split was triggered before the  
279 intensification of human activities of the last 50 years in the Yangtze River. This event may  
280 thus have been related to the colonization process itself during the post-glacial period<sup>19</sup>  
281 and/or other environmental or human-related factors. Consistent with the hypothesis of  
282 population split driven by post-glacial changes, episodes of contraction and expansion of the  
283 Yangtze River mainstream and the adjacent lakes occurred during the Holocene period<sup>39</sup>.  
284 Interestingly, the Yangtze River mainstream and the appendage lakes, including the Poyang  
285 and Dongting lakes, retracted and shrank significantly during the late Holocene (from *ca.*  
286 3000 years BP to now)<sup>39-41</sup>. These environmental changes might have promoted the split of  
287 the ancestral population after the colonization of the Yangtze River.

288

289 Each population harboured a genetic footprint of dramatic population reduction. This  
290 especially affected the genetic diversity at the microsatellite markers which displayed very  
291 small values of the  $M_{GW}$  statistic (Table 1) characteristic of significant recent decline<sup>34</sup>. This is  
292 also indicated by the ABC analysis supporting a scenario describing a drastic population  
293 reduction in each population within the last five generations (Fig. 4b<sub>ii</sub>, SC2). According to this  
294 scenario, the reduction in effective size would have been massive since their current sizes  
295 would be less than ~2% of their pre-collapsed sizes (Fig. 4, Table 3, S10 and S11). These  
296 genetic inferences are in line with the field estimates<sup>14,15,42</sup>, reporting a continuous decline of  
297 the YFP since the 1980s<sup>10-15,43,44</sup>. Half of the census populations in the main stem of the  
298 Yangtze River would have been lost within the past 15 years, with the abundance dropping  
299 from 2,500 porpoises in 1991<sup>10</sup> to 1,225 in 2006<sup>13</sup>. With the 400 porpoises in the Poyang Lake  
300 and the 100 to 150 porpoises of the Dongting Lake, the total census size in the Yangtze River  
301 and the two adjacent lakes observed in 2006 was only 1,800 individuals. The most recent  
302 estimates from the YFDE2012 showed that the porpoises in the main stem of the Yangtze  
303 would have been reduced again by half with 505 individuals reported the middle and lower

304 reaches of the Yangtze River and approximately 450 porpoises in PY, and 90 porpoises in  
305 DT<sup>14</sup>.

306 These very small census populations sizes ( $N$ ) are consistent with the very small  
307 contemporary effective population size ( $N_e$ ) estimated from genetic data ( $\leq 92$  individuals) in  
308 each population, with the XCSS population being the smallest of all three differentiated  
309 populations (between 14 and 22 individuals, Table 3). Comparably low estimates have been  
310 reported in other cetacean species, such as the southern Iberian ecotype of harbour porpoise  
311 (*Phocoena phocoena meridionalis*) in European waters ( $N_e \leq 80^{17,45}$ ) or the coastal ecotype of  
312 bottlenose dolphins (*Tursiops truncatus*) in European waters ( $N_e \leq 77^{46}$ ). However only highly  
313 endangered populations, such as the Borneo Orangutans (*Pongo pygmaeus*)<sup>47</sup> or the  
314 Canadian woodland caribou (*Rangifer tarandus*)<sup>48</sup>, have  $N_e$  values as low as those observed  
315 in the XCSS population. Extremely low  $N_e$  clearly translate the very low genetic diversity  
316 observed in each population of the YFP and imply very low numbers of breeding individuals in  
317 each populations of the Yangtze River and the adjacent lakes<sup>49</sup>. However, drawing a more  
318 direct link between  $N_e$  and  $N$  is actually difficult considering our study design. Previous  
319 studies have shown that no direct relationship can be expected between  $N_e$  and  $N$  when  
320 generations are overlapping, sampling spans several years, includes multiple cohorts and age  
321 classes, and when immigration may occur<sup>50-52</sup>.

322

323 The three YFP populations – XCSS, TL and PY– have not exchanged migrants over the last few  
324 generations according to our genetic estimates (Fig. 3 and Table S1). However, all three are  
325 or have been recently connected to the admixed group. We observed genetic evidence of  
326 unidirectional gene flow from the admixed group to XCSS and TL. This recent migration in the  
327 middle section of the Yangtze and XCSS in the upper section may be rare and/or no longer  
328 occurring based on the observed fixation of the mitochondrial haplotype in the XCSS  
329 population (Table 1 and Fig. 2d). This is further supported by the YFDE2006 and YFDE2012  
330 surveys that reported increasing gaps in the distribution of the species in the upper section of  
331 the Yangtze River<sup>14</sup>. In contrast to the two other populations in the main stream river, gene  
332 flow was in the opposite direction in the Poyang Lake, from PY to the Admixed group (Fig. 3  
333 and Table S1). This is consistent with field observations reporting groups of porpoises from PY  
334 moving to the main river stem in the morning and back to the lake in the afternoon<sup>43</sup>. This  
335 result also supports previous assertion<sup>14</sup> that immigration of porpoises from PY to the river

336 may dampen population decline in the Yangtze River. Unfortunately, such migration is likely  
337 insufficient given the observed ongoing decline<sup>14,42</sup>. In principle, the admixed group in the  
338 middle section of the Yangtze River could serve as a bridge connecting the three  
339 differentiated populations. However, our gene flow estimates do not support this (Fig. 3) and  
340 are consistent with the increasing observation of gaps in the distribution of the YFP and the  
341 loss of connectivity between populations.

342

343 Additional populations of YFP may exist in the Yangtze mainstream as the YFP is known to  
344 occur upstream and downstream from our study area (Fig. 1). For example, the three  
345 porpoises sampled around Shanghai city (SH) seem to belong to another differentiated unit  
346 (Fig. 2), but no definitive conclusions can be drawn at this time due to low sample size (n=3).  
347 Nevertheless, the present study provides a representative view of the population genetic  
348 structure, connectivity and demographic trends that can help to define priority areas where  
349 conservation measures need to be taken.

350

351 Drastic reduction in population abundance has left a clearly detectable genetic footprint on  
352 the genetic diversity of the YFP and coincides with the loss of connectivity between  
353 populations as well as the intensification of human activities along the Yangtze River over the  
354 last 50 years. To ensure that connectivity between populations is maintained, mitigation of  
355 human impacts need to include the entire river catchment<sup>44</sup>. For example, restricting fishing  
356 and sand-mining activities in the mouth area of Poyang Lake (Hukou, Fig. 1) could restore the  
357 lake-river migration of the YFP. Modification of current *in situ* reserves could improve  
358 connectivity between Ezhou and Zhenjiang (Fig. 1). Likewise, more active measures including  
359 a whole year fishing ban in the *in situ* natural reserves could certainly help<sup>14</sup> and possible  
360 translocation of isolated individuals in the hope of increasing breeding opportunities could  
361 increase genetic diversity.

362

363

364

## Material & Methods

365

366 ***Samples collection and DNA extraction.*** A total of 153 Yangtze finless porpoises were sampled

367 between 1998 and 2011 across the distribution range (Fig. 1), including 3 from Shanghai (SH),  
368 17 from Tongling (TL), 5 from Anqing (AQ), 15 from Ezhou-Huangshi (EZHS), 3 from Wuhan  
369 (WH), 14 from Honghu-Paizhou (HHPZ), 2 from Jianli (JL), 16 from Xingchang-Shishou (XCSS),  
370 20 from Dongting Lake (DT) and 58 from Poyang Lake (PY). A detailed description of the  
371 sampling procedure and genomic DNA extraction is provided in Chen *et al.*<sup>20</sup>. Briefly, blood  
372 samples (n=113) were drawn from the caudal vein of live porpoises, immediately preserved in  
373 an Acid-Citrate-Dextrose solution, and stored in liquid nitrogen. Tissue samples (n=40, mainly  
374 muscle) were obtained from dead porpoises and preserved in 80% alcohol. Samples from the  
375 Yangtze mainstream and Dongting Lake were collected from accidentally killed or stranded  
376 individuals over the past decade. Fifty-eight blood samples from PY were collected from live  
377 animals during three field surveys conducted in early spring of 2009 (n=28), 2010 (n=17) and  
378 2011 (n=13), under a special permit from the Poyang Lake Fishery and Fishing Administration  
379 Office of Jiangxi Province. Gender was identified by visual inspection of the genital parts. In  
380 total, 76 males and 77 females were sampled. The sampling was conducted in accordance  
381 with the Regulations of the People's Republic of China for the Implementation of Wild Aquatic  
382 Animal Protection promulgated in 1993 by the Food and Agriculture Organization of the  
383 United Nations (FAO, FAOLEX No. LEX-FAOC011943,  
384 <http://www.fao.org/faolex/results/details/en/?details=LEX-FAOC011943>), adhering to all  
385 ethical guidelines and legal requirements in China.

386 Total genomic DNA was isolated from blood samples using the Whole Genome DNA  
387 Extraction Kit (SBS, Shanghai Inc.) following the manufacturer's instructions. For tissue  
388 samples, total genomic DNA was extracted using a standard proteinase K digestion and  
389 phenol/chloroform extraction protocol<sup>53</sup>.

390

391 **Microsatellite and mitochondrial data set.** Microsatellite and mitochondrial (mtDNA) data have  
392 been previously obtained and described by Chen *et al.*<sup>20</sup>. All 153 porpoises were genotyped at  
393 11 polymorphic microsatellite loci (YFSSR1, YFSSR42, YFSSR59, YFSSR5, YFSSR40 from *N. p.*  
394 *asiaeorientalis*<sup>54,55</sup>, NP391, NP404, NP409, NP464, NP428 from *N. phocaenoides*<sup>56,57</sup>, and  
395 PPHO130 from *Phocoena phocoena*<sup>58</sup>. The genotyping protocol and quality checks have been  
396 described in Chen *et al.*<sup>20</sup>. In the subsequent analyses of the microsatellites, we only kept  
397 individuals for which we had at least 50% of the locus available (i.e. at least 5 microsatellite  
398 loci and the mtDNA or 6 microsatellite loci). Those filters excluded of 5 individuals, leading to

399 a final data set of 148 individuals. The mtDNA data includes a 597 base-pairs fragment of the  
400 hyper-variable region 1 of the control region successfully sequenced for 129 individuals (see  
401 Chen *et al.*<sup>20</sup> for details on the PCR and sequencing procedures). The microsatellite and  
402 mtDNA-CR data are available in Supplementary Dataset S1.

403

404

405 **Population genetic structure.** We used the Bayesian model-based clustering of *STRUCTURE*  
406 v2.3.4<sup>26</sup> to estimate the admixture proportions for each individual to each cluster identified in  
407 the microsatellite data. *STRUCTURE* cluster individual multilocus genotypes into  $K$  groups  
408 while minimizing departures from Hardy-Weinberg and Linkage Equilibria. We used the  
409 admixture *Locprior* model with correlated allele frequencies designed to detect weak signals  
410 of genetic structure without introducing bias or forcing the clustering<sup>26</sup>. We conducted a  
411 series of independent runs with different value for  $K$  from 1 to 5. Each run used  $1 \times 10^6$   
412 iterations after a burn-in of length  $2 \times 10^5$ . To assess that convergence of the Monte Carlo  
413 Markov Chains (MCMCs) had been reached, we performed 10 independent replicates for  
414 each  $K$  and checked the consistency of results using *CLUMPAK*<sup>59</sup>. We assessed which  $K$  value  
415 best fit with the data using (1) the likelihood of each  $K$ , following *STRUCTURE*'s user manual;  
416 (2) its rate of change with increasing  $K$ <sup>60</sup>; and (3) visual inspection of newly created clusters  
417 with increasing  $K$ <sup>61</sup>. Post-processing of the results, including generation of barplots, was  
418 conducted using *CLUMPAK*<sup>59</sup>. The geographic distribution of each group (Fig. 2) was mapped  
419 using the R statistical package *MARMAP* v.0.9.5<sup>62</sup> and ETOPO dataset<sup>63</sup>.

420

421 The genetic structure in the microsatellite data was further inspected using a Discriminant  
422 Analysis of Principal Components (DAPC)<sup>28</sup> and a Principal Component Analysis (PCA)<sup>27,29</sup>.  
423 These exploratory methods does not rely on any model assumptions and provides a  
424 complementary validation of the structure depicted by *STRUCTURE*<sup>64</sup>. These analysis were  
425 conducted using *adegenet* 2.0.1 package<sup>65</sup> for R<sup>66</sup> on centred genetic data (i.e. set to a mean  
426 allele frequency of zero), with missing data replaced by the mean, following the authors'  
427 recommendations. The PCA was used to display the individual multilocus genotypes into a  
428 reduced multidimensional space defined by the first two principal components (PCs),  
429 colour-coding each individual according to the clustering identified by *STRUCTURE*, in order to  
430 assess the congruence. The DAPC method identifies genetic clusters by optimizing the

431 difference between predefined groups and minimizing the variation within those groups<sup>28</sup>. It  
432 first reduces the number of variables using a PCA and then maximises the differences  
433 between groups using a Discriminant Analysis. The DAPC was performed with prior  
434 information on groups using the clusters defined by *STRUCTURE*. The number of PCs to retain  
435 and the reliability of the DAPC were determined using the cross-validation approach present  
436 in the *adegenet* 2.0.1 package<sup>65</sup> for R<sup>66</sup>. As a result of this cross-validation step, a total of 60  
437 PCs and 4 discriminant functions were retained to describe the relationship between the  
438 clusters. This number of PCs captured 80% of the total variation and provided the highest  
439 percent of correctly predicted subsamples with the lowest error. Finally, the score of each  
440 individual for the first two discriminant functions (DFs) were plotted as scatter plot in R and  
441 the memberships probability of each individual to the clusters defined by the DAPC were  
442 plotted as barplot in R.

443

444 **Genetic diversity and differentiation.** We compared microsatellite genetic diversity between  
445 populations using the allelic richness ( $A_r$ ) and private  $A_r$  ( $pA_r$ ) computed with *ADZE*<sup>67</sup>, and the  
446 observed and expected heterozygosity ( $H_o$  and  $H_e$ ) computed with *GenAlEx* v6.5<sup>68</sup>. Departures  
447 from Hardy-Weinberg were tested using  $10^4$  permutations with *FSTAT* v2.9.3.2<sup>70</sup> and  
448 quantified using  $F_{IS}$  and  $F_{ST}$ <sup>69</sup> in *GenAlEx* v6.5<sup>68</sup>. We applied a Bonferonni correction to correct  
449 for multiple tests.

450 Mitochondrial genetic diversity was estimated for each of the genetically distinct groups  
451 identified in the present study. Variation among sequences was measured using the number  
452 of segregating sites ( $S$ ), number of singletons and shared polymorphisms, number of  
453 haplotypes, haplotype diversity ( $H_d$ ) and two estimators of population genetic diversity,  $\pi$   
454 based on the average number of pairwise differences<sup>71</sup> and  $\theta_W$  based on the number of  
455 polymorphic sites<sup>72</sup>. All statistics were calculated using *DNASP* v5.10.01<sup>73</sup>. We used the  $F_{ST}$   
456 statistics estimated from the average number of differences within and between  
457 populations<sup>74</sup>. Significance was tested with 1,000 permutations of Hudson's nearest  
458 neighbour distance *Snn* statistics, which measures how often the nearest neighbour of a  
459 sequence (in sequence space) is from the same population<sup>75</sup>.

460

461 **Contemporary effective population sizes.** We used *NeEstimator* v2.01<sup>30</sup> as a first approach to  
462 estimate contemporary  $N_e$  based on linkage disequilibrium (LD) between loci, filtering out



463 rare alleles with a frequency  $P_{crit} \leq 0.02$  that could bias  $N_e$  estimate<sup>76</sup>. The second method  
464 implemented in *ONESAMP* v1.2<sup>31</sup> also use LD as summary statistics among others in an  
465 Approximate Bayesian Computation (ABC) to estimate  $N_e$ , considering uniform prior between  
466 2 and 500 of  $N_e$ .

467

468 **Contemporary gene flow between populations.** We estimated contemporary effective  
469 migration rate ( $m$ ) between populations using *BayesAss* v.3.0.3<sup>32</sup>. Preliminary runs were  
470 performed to adjust the mixing parameters of the MCMC and ensure proposal acceptance  
471 rates between 20% and 60% following authors' recommendations. We then performed 12  
472 independent runs with different seeds, a burn-in of  $5 \times 10^6$  iterations followed by  $2 \times 10^8$   
473 iterations, and a sampling parameter values every 2000 iterations. Convergence of the  
474 MCMCs was checked by comparing the traces of each run using *Tracer* v1.5<sup>77</sup> and by  
475 evaluating the Effective Sample Sizes (ESSs) of each parameter, keeping only runs where  $ESS \geq$   
476 200. Model fitting to the data was assessed using the Bayesian Deviance Index using the  
477 R-script of Meirmans<sup>33</sup>. Runs that converged were combined to estimate the mean, median  
478 and 95% Highest Probability Density interval for each parameter in *Tracer* v1.5. The effective  
479 number migrants ( $N_e \times m$ ) per generation between populations was obtained by combining  
480  $N_e$  and  $m$  estimates.

481

482 **Genetic inference of population demographic history.** We used *DIYABC* v2.1<sup>78</sup> to estimate the  
483  $M_{GW}$  value and conduct  $1 \times 10^6$  coalescent simulations to produce a null distribution against  
484 which the observed value could be compared. The  $P$ -value indicates the proportion of  
485 simulations which provide a value below the observed one. For the mtDNA-CR, we used the  
486 Tajima's  $D$ <sup>35</sup> and tested for significant departure from a null expectations using 10,000  
487 coalescent simulations in *DNAsp*<sup>73</sup>.

488

489 Next, we investigated the demographic history best describing the genetic diversity of the  
490 combined microsatellite and mtDNA markers using a coalescent-based ABC approach<sup>22</sup>. We  
491 subdivided our workflow in two nested parts (Fig. 4): identify the most likely population tree  
492 topology for our dataset among 10 plausible scenarios describing different potential  
493 population branching (Fig. 4a); and then test for evidence of changes in effective population  
494 size in the ancestral and daughter populations (Fig. 4b). This later part was further subdivided



495 in two steps, (i) first testing for simple changes in effective population size ( $N_e$ ) with six  
496 nested competing scenarios, and (ii) then testing whether adding the known population  
497 decline observed in each population over the last 50 yrs in the best scenario improved  
498 significantly the model fit to the data (Fig. 4b, Table S2 and S3).

499 For each part (Fig. 4), an ABC analysis was conducted using the program DIYABC v.2.1.0<sup>78</sup>  
500 applying the following steps (Fig. S4): (1) coalescent simulations of  $1 \times 10^6$  pseudo-observed  
501 datasets (PODs) for each competing scenario and calculation of summary statistics (SS)  
502 describing the observed genetic variation for each POD; (2) select the best model by  
503 estimating the posterior probability (PPr) of each scenario using two approaches: the  
504 “standard” procedure relying on a logistic regression on 1% PODs producing SS values closest  
505 to the observed ones after a Linear Discriminant Analysis (ABC-LDA) as a pre-processing  
506 step<sup>36</sup> and the recently introduced Random Forest (ABC-RF) procedure<sup>37,38</sup>; (3) evaluate the  
507 confidence in scenario choice by estimating the type-I and type-II error rates based on  
508 simulated PODs using the ABC-LDA, as well as the prior error rate from the of the ABC-LDA  
509 and ABC-RF<sup>37,38</sup>; (4) estimate the marginal posterior distribution of each parameter based on  
510 the best model including (among other)  $N_e$  and times of population size changes and splits  
511 ( $T$ ); and finally, (5) evaluate the goodness-of-fit of the fitted model to the data. Details are  
512 provided in Fig. 4 and in the supplementary materials (Appendix S1, Fig. S4, Table S2, S3).

513

514

515

---

516 ***Acknowledgments.***

517 We thank Pr. JL Olsen for constructive comments. This work was supported by the National Key  
518 Programme of Research and Development (2016YFC0503200) from Ministry of Science and  
519 Technology of China, the National Natural Science Foundation of China (Nos. 30730018, 31430080),  
520 the Special Fund for Agro-scientific Research in the Public Interest (No. 201203086), and the Special  
521 Conservation Fund for the Yangtze finless porpoise from the Ministry of Agriculture of China. This  
522 work was also supported by Major Project of Natural Science Research in Anhui Province (No.  
523 KJ2016A863).

524

525 ***Author contributions.***

526 MCF, JZ, DW designed the study; MC, JZ, ZM, YH, KW, MW, QZ, DW conducted the field expeditions  
527 and collected the samples; MC conducted the laboratory experiments and collected the data; MCF,

528 YBC and FL analysed the data; MCF interpreted the results and wrote the manuscript with help from  
529 YBC, MC, JZ and DW, and final approval by all co-authors.

530

### 531 *Additional information*

532 **Data accessibility.** All data generated during this study are included in this article (and its  
533 Supplementary Information files).

534 **Competing financial interests:** the authors declare no competing financial interests.

535 **Supplementary information** accompanies this paper at <http://www.nature.com/srep>

536

537

538

---

## 539 References

540

- 541 1. Marko, P. B. & Hart, M. W. The complex analytical landscape of gene flow inference. *Trends Ecol. Evol.*  
542 **26**, 448–456 (2011).
- 543 2. Epps, C. W. & Keyghobadi, N. Landscape genetics in a changing world: disentangling historical and  
544 contemporary influences and inferring change. *Mol. Ecol.* **24**, 6021–6040 (2015).
- 545 3. Fahrig, L. Effects of Habitat Fragmentation on Biodiversity. *Annu. Rev. Ecol. Evol. Syst.* **34**, 487–515  
546 (2003).
- 547 4. Hale, M. L. *et al.* Impact of landscape management on the genetic structure of red squirrel populations.  
548 *Science* **293**, 2246–2248 (2001).
- 549 5. Mech, S. G. & Hallett, J. G. Evaluating the effectiveness of corridors: a genetic approach. *Conserv. Biol.*  
550 **5**, 467–474 (2001).
- 551 6. Carroll, C., McRae, B. H. & Brookes, A. Use of linkage mapping and centrality analysis across habitat  
552 gradients to conserve connectivity of gray wolf populations in western North America. *Conserv. Biol.* **26**,  
553 78–87 (2012).
- 554 7. Turvey, S. T. *et al.* First human-caused extinction of a cetacean species? *Biol. Lett.* **3**, 537–540 (2007).
- 555 8. Gao, A. & Zhou, K. Geographical variation of external measurements and three subspecies of  
556 *Neophocaena phocaenoides* in Chinese waters. *Acta Theriol. Sin.* **15**, 81–92 (1995).
- 557 9. Wang, D., Turvey, S. T., Zhao, X. & Mei, Z. *Neophocaena asiaorientalis ssp. The IUCN Red List of*  
558 *Threatened Species* e.T43205774A45893487 (accessed on 2017-10-02) (2013).  
559 doi:10.2305/IUCN.UK.2013-1.RLTS.T43205774A45893487.en
- 560 10. Zhang, X. *et al.* The population of finless porpoise in the middle and lower reaches of Yangtze river. *Acta*  
561 *Theriol. Sin.* **13**, 260–270 (1993).
- 562 11. Yang, J., Xiao, W., Kuang, X., Wei, Z. & Liu, R. Studies on the distribution, population size and the active  
563 regularity of *Lipotes vexillifer* and *Neophocaena phocaenoides* in Dongting Lake and Boyang Lake.  
564 *Resour. Env. Yangtze Valley* **9**, 444–450 (2000).
- 565 12. Xiao, W. & Zhang, X. Distribution and population size of Yangtze finless porpoise in Poyang Lake and its  
566 branches. *Acta Theriol. Sin.* **22**, 7–14 (2002).
- 567 13. Zhao, X. *et al.* Abundance and conservation status of the Yangtze finless porpoise in the Yangtze River,  
568 China. *Biol. Conserv.* **141**, 3006–3018 (2008).
- 569 14. Mei, Z. *et al.* The Yangtze finless porpoise: On an accelerating path to extinction? *Biol. Conserv.* **172**,  
570 117–123 (2014).
- 571 15. Mei, Z. *et al.* Accelerating population decline of Yangtze finless porpoise (*Neophocaena asiaorientalis*  
572 *asiaorientalis*). *Biol. Conserv.* **153**, 192–200 (2012).
- 573 16. Fontaine, M. C. *et al.* History of expansion and anthropogenic collapse in a top marine predator of the  
574 Black Sea estimated from genetic data. *P. Natl. Acad. Sci. USA* **109**, E2569–76 (2012).
- 575 17. Fontaine, M. C. *et al.* Postglacial climate changes and rise of three ecotypes of harbour porpoises,  
576 *Phocoena phocoena*, in western Palearctic waters. *Mol. Ecol.* **23**, 3306–3321 (2014).

- 577 18. Yang, G., Guo, L., Bruford, M. W., Wei, F. & Zhou, K. Mitochondrial phylogeography and population  
578 history of finless porpoises in Sino-Japanese waters. *Biol. J. Linn. Soc.* **95**, 193–204 (2008).
- 579 19. Lin, W. *et al.* Phylogeography of the finless porpoise (genus *Neophocaena*): testing the stepwise  
580 divergence hypothesis in the northwestern Pacific. *Sci. Rep.* **4**, 6572 (2014).
- 581 20. Chen, M. *et al.* Genetic Diversity and Population Structure of the Critically Endangered Yangtze Finless  
582 Porpoise (*Neophocaena asiaeorientalis asiaeorientalis*) as Revealed by Mitochondrial and Microsatellite  
583 DNA. *Int. J. Mol. Sci.* **15**, 11307–11323 (2014).
- 584 21. Beaumont, M. A. Approximate Bayesian Computation in Evolution and Ecology. *Annu. Rev. Ecol. Evol.*  
585 *Syst.* **41**, 379–406 (2010).
- 586 22. Csilléry, K., Blum, M. G. B., Gaggiotti, O. E. & Francois, O. Approximate Bayesian Computation (ABC) in  
587 practice. *Trends Ecol. Evol.* **25**, 410–418 (2010).
- 588 23. Cornuet, J.-M., Ravignie, V. & Estoup, A. Inference on population history and model checking using DNA  
589 sequence and microsatellite data with the software DIYABC (v1.0). *BMC Bioinform.* **11**, 401 (2010).
- 590 24. Pritchard, J. K., Stephens, M. & Donnelly, P. Inference of population structure using multilocus genotype  
591 data. *Genetics* **155**, 945–959 (2000).
- 592 25. Falush, D., Stephens, M. & Pritchard, J. K. Inference of population structure using multilocus genotype  
593 data: linked loci and correlated allele frequencies. *Genetics* **164**, 1567–1587 (2003).
- 594 26. Hubisz, M. J., Falush, D., Stephens, M. & Pritchard, J. K. Inferring weak population structure with the  
595 assistance of sample group information. *Mol. Ecol. Resour.* **9**, 1322–1332 (2009).
- 596 27. Jombart, T., Pontier, D. & Dufour, A.-B. Genetic markers in the playground of multivariate analysis.  
597 *Heredity* **102**, 330–341 (2009).
- 598 28. Jombart, T., Devillard, S. & Balloux, F. Discriminant analysis of principal components: a new method for  
599 the analysis of genetically structured populations. *BMC Genet.* **11**, 94 (2010).
- 600 29. Patterson, N., Price, A. L. & Reich, D. Population Structure and Eigenanalysis. *PLoS Genet.* **2**, e190  
601 (2006).
- 602 30. Do, C. *et al.* NeEstimator v2: re-implementation of software for the estimation of contemporary  
603 effective population size (*N<sub>e</sub>*) from genetic data. *Mol. Ecol. Resour.* **14**, 209–214 (2014).
- 604 31. Tallmon, D. A., Koyuk, A., Luikart, G. & Beaumont, M. A. ONESAMP: a program to estimate effective  
605 population size using approximate Bayesian computation. *Mol. Ecol. Resour.* **8**, 299–301 (2008).
- 606 32. Wilson, G. A. & Rannala, B. Bayesian inference of recent migration rates using multilocus genotypes.  
607 *Genetics* **163**, 1177–1191 (2003).
- 608 33. Meirmans, P. G. Nonconvergence in Bayesian estimation of migration rates. *Mol. Ecol. Resour.* **14**, 726–  
609 733 (2014).
- 610 34. Garza, J. C. & Williamson, E. G. Detection of reduction in population size using data from microsatellite  
611 loci. *Mol. Ecol.* **10**, 305–318 (2001).
- 612 35. Tajima, F. Statistical method for testing the neutral mutation hypothesis by DNA polymorphism.  
613 *Genetics* **123**, 585–595 (1989).
- 614 36. Estoup, A. *et al.* Estimation of demo-genetic model probabilities with Approximate Bayesian  
615 Computation using linear discriminant analysis on summary statistics. *Mol. Ecol. Resour.* **12**, 846–855  
616 (2012).
- 617 37. Pudlo, P. *et al.* Reliable ABC model choice via random forests. *Bioinformatics* **32**, 859–866 (2016).
- 618 38. Fraimout, A. *et al.* Deciphering the routes of invasion of *Drosophila suzukii* by means of ABC random  
619 forest. *Mol. Biol. Evol.* **34**, 980–996 (2017).
- 620 39. Wu, L., Li, F., Zhu, C., Li, L. & Li, B. Holocene environmental change and archaeology, Yangtze River  
621 Valley, China: Review and prospects. *Geosci. Front.* **3**, 875–892 (2012).
- 622 40. Zhang, X. Y., Cai, S. M. & Sun, S. C. Evolution of Dongting Lake since Holocene. *J. Lake Sci.* **60**, 13–21  
623 (1994).
- 624 41. Fang, J.-Q. Lake evolution during the last 3000 years in China and its implications for environmental  
625 change. *Quat. Res.* **39**, 175–185 (1993).
- 626 42. Dong, L. *et al.* Yangtze finless porpoises along the main channel of Poyang Lake, China: Implications for  
627 conservation. *Mar. Mamm. Sci.* **31**, 612–628 (2015).
- 628 43. Wei, Z., Wang, D., Zhang, Q., Wang, K. & Kuang, X. Population size, behavior, movement pattern and  
629 protection of Yangtze finless porpoise at balijiang section of the Yangtze River. *Resour. Env. Yangtze*  
630 *Valley* **11**, 427–432 (2002).
- 631 44. Huang, S.-L. *et al.* Saving the Yangtze finless porpoise: Time is rapidly running out. *Biol. Conserv.* **20**,  
632 40–46 (2017).
- 633 45. Fontaine, M. C. *et al.* Genetic and historic evidence for climate-driven population fragmentation in a top

- 634 cetacean predator: the harbour porpoises in European water. *Proc. R. Soc. B* **277**, 2829–2837 (2010).
- 635 46. Louis, M. *et al.* Habitat-driven population structure of bottlenose dolphins, *Tursiops truncatus*, in the
- 636 North-East Atlantic. *Mol. Ecol.* **23**, 857–874 (2014).
- 637 47. Goossens, B. *et al.* Genetic Signature of Anthropogenic Population Collapse in Orang-utans. *PLoS Biol.* **4**,
- 638 e25 (2006).
- 639 48. Weckworth, B. V. *et al.* Preferred habitat and effective population size drive landscape genetic patterns
- 640 in an endangered species. *Proc. R. Soc. B* **280**, 20131756 (2013).
- 641 49. Waples, R. S. Genetic estimates of contemporary effective population size: to what time periods do the
- 642 estimates apply? *Mol. Ecol.* **14**, 3335–3352 (2005).
- 643 50. Palstra, F. P. & Fraser, D. J. Effective/census population size ratio estimation: a compendium and
- 644 appraisal. *Ecol. Evol.* **2**, 2357–2365 (2012).
- 645 51. Hare, M. P. *et al.* Understanding and Estimating Effective Population Size for Practical Application in
- 646 Marine Species Management. *Conserv. Biol.* **25**, 438–449 (2011).
- 647 52. Waples, R. S. & England, P. R. Estimating Contemporary Effective Population Size on the Basis of Linkage
- 648 Disequilibrium in the Face of Migration. *Genetics* **189**, 633–644 (2011).
- 649 53. Sambrook, J. & Russell, D. W. *Molecular Cloning: A Laboratory Manual*. (CSHL Press, 2012).
- 650 54. Zheng, J. S. *et al.* Development and characterization of polymorphic microsatellite loci in the
- 651 endangered Yangtze finless porpoise (*Neophocaena phocaenoides asiaeorientalis*). *Conserv. Genet.* **9**,
- 652 1007–1009 (2008).
- 653 55. Zhou, Z., Zheng, J. S., Chen, M. M., Zhao, Q. Z. & Wang, D. Genetic evaluation and development
- 654 prognosis on *ex situ* conserved Yangtze finless porpoise living in Tian-E-Zhou National Natural Reserve.
- 655 *Acta Theriol. Sin.* **36**, 403–411 (2012).
- 656 56. Chen, L., Bruford, M. & Yang, G. Isolation and characterization of microsatellite loci in the finless
- 657 porpoise (*Neophocaena phocaenoides*). *Mol. Ecol. Notes* **7**, 1129–1131 (2007).
- 658 57. Chen, L. & Yang, G. Development of tetranucleotide microsatellite loci for the finless porpoise
- 659 (*Neophocaena phocaenoides*). *Conserv. Genet.* **9**, 1033–1035 (2008).
- 660 58. Rosel, P. E., France, S. C., Wang, J. Y. & Kocher, T. D. Genetic structure of harbour porpoise *Phocoena*
- 661 *phocoena* populations in the northwest Atlantic based on mitochondrial and nuclear markers. *Mol. Ecol.*
- 662 **8**, S41–S44 (1999).
- 663 59. Kopelman, N. M., Mayzel, J., Jakobsson, M., Rosenberg, N. A. & Mayrose, I. Clumpak: a program for
- 664 identifying clustering modes and packaging population structure inferences across K. *Mol. Ecol. Resour.*
- 665 **15**, 1179–1191 (2015).
- 666 60. Evanno, G., Regnaut, S. & Goudet, J. Detecting the number of clusters of individuals using the software
- 667 structure: a simulation study. *Mol. Ecol.* **14**, 2611–2620 (2005).
- 668 61. Vercken, E. *et al.* Glacial refugia in pathogens: European genetic structure of anther smut pathogens on
- 669 *Silene latifolia* and *Silene dioica*. *PLoS Pathog.* **6**, e1001229 (2010).
- 670 62. Pante, E. & Simon-Bouhet, B. marmap: A package for importing, plotting and analyzing bathymetric and
- 671 topographic data in R. *PLoS ONE* **8**, e73051 (2013).
- 672 63. Amante, C. & Eatkins, B. W. ETOPO1 1 Arc-Minute Global Relief Model: Procedures, Data Sources and
- 673 Analysis. NOAA Technical Memorandum NESDIS NGDC-24. National Geophysical Data Center, NOAA.
- 674 (2009). doi:10.7289/V5C8276M [accessed 2017-10-02].
- 675 64. Francois, O. & Durand, E. Spatially explicit Bayesian clustering models in population genetics. *Mol. Ecol.*
- 676 *Resour.* **10**, 773–784 (2010).
- 677 65. Jombart, T. adegenet: a R package for the multivariate analysis of genetic markers. *Bioinformatics* **24**,
- 678 1403–1405 (2008).
- 679 66. R Core Team. R: A Language and Environment for Statistical Computing. *R Foundation for Statistical*
- 680 *Computing* (2016).
- 681 67. Szpiech, Z. A., Jakobsson, M. & Rosenberg, N. A. ADZE: a rarefaction approach for counting alleles
- 682 private to combinations of populations. *Bioinformatics* **24**, 2498–2504 (2008).
- 683 68. Peakall, R. & Smouse, P. E. GenAlEx 6.5: genetic analysis in Excel. Population genetic software for
- 684 teaching and research—an update. *Bioinformatics* **28**, 2537–2539 (2012).
- 685 69. Weir, B. S. & Cockerham, C. C. Estimating F-statistics for the analysis of population structure. *Evolution*
- 686 **38**, 1358–1370 (1984).
- 687 70. Goudet, J. FSTAT, A program to estimate and test gene diversities and fixation indices (version 2.9.3).
- 688 Available at <http://www2.unil.ch/popgen/softwares/fstat.htm> [accessed 2017-10-02]. (2001).
- 689 71. Tajima, F. Evolutionary relationship of DNA sequences in finite populations. *Genetics* **105**, 437–460
- 690 (1983).

- 691 72. Watterson, G. A. On the number of segregating sites in genetical models without recombination. *Theor.*  
692 *Popul. Biol.* **7**, 256–276 (1975).
- 693 73. Librado, P. & Rozas, J. DnaSP v5: a software for comprehensive analysis of DNA polymorphism data.  
694 *Bioinformatics* **25**, 1451–1452 (2009).
- 695 74. Hudson, R. R., Boos, D. D. & Kaplan, N. L. A statistical test for detecting geographic subdivision. *Mol.*  
696 *Biol. Evol.* **9**, 138–151 (1992).
- 697 75. Hudson, R. R. A new statistic for detecting genetic differentiation. *Genetics* **155**, 2011–2014 (2000).
- 698 76. Waples, R. S. & Do, C. Linkage disequilibrium estimates of contemporary  $N_e$  using highly variable genetic  
699 markers: a largely untapped resource for applied conservation and evolution. *Evol. Appl.* **3**, 244–262  
700 (2010).
- 701 77. Rambaut, A. Tracers v1.5 Available from <http://tree.bio.ed.ac.uk/software/tracer/> [accessed  
702 2017-07-05]. (2007).
- 703 78. Cornuet, J.-M. *et al.* DIYABC v2.0: a software to make approximate Bayesian computation inferences  
704 about population history using single nucleotide polymorphism, DNA sequence and microsatellite data.  
705 *Bioinformatics* **30**, 1187–1189 (2014).
- 706

## Figure legends

707

708

709 Figure 1 | Maps showing the sampling distribution of the Yangtze finless porpoises in the  
710 Yangtze River. The top-left insert shows the location of the studied area highlighted by a red  
711 rectangle. On the right, the map shows the sampling locations (orange triangles) and their  
712 acronyms based on the neighbouring cities. Figure created using ArcGIS 10.3 software using  
713 the open source data from the ETOPO1 Global Relief Model<sup>63</sup>  
714 (<https://www.ngdc.noaa.gov/mgg/global/>).

715

716 Figure 2 | (a) Population structure estimated using the Bayesian clustering approach of  
717 *STRUCTURE*. Each individual is represented by a vertical line divided into K segments showing  
718 the admixture proportions from each cluster. Sample size in each locality is shown between  
719 brackets. Numbers on the right side of the barplot show the number of time this result was  
720 found out of the 10 replicates. (b) *DAPC* cluster membership probability plot of the 148  
721 individuals. (c) Scatter plot showing the first two discriminant functions (DFs) of the *DAPC*. (d)  
722 Geographical distribution of the *STRUCTURE* admixture proportions and mitochondrial  
723 haplotype frequencies per localities. The mtDNA map is modified from Chen *et al.*<sup>20</sup>. Panel (a)  
724 was created using CLUMPAK<sup>59</sup>, panel (b) and (c) using R v.3.4.0<sup>66</sup>, and panel (d) using R  
725 v.3.4.0<sup>66</sup>, the package MARMAP v.0.9.5<sup>62</sup>, and the open source ETOPO1 Global Relief Model<sup>63</sup>  
726 (<https://www.ngdc.noaa.gov/mgg/global/>).

727

728 Figure 3 | Recent gene flow ( $Ne \times m$ ) between populations estimated from *ONESAMP* and  
729 *BayesAss*. Confidence intervals are shown between squared brackets. Arrows show the  
730 effective migration rate significantly (plain) and not significantly different (dashed) from 0.  $Ne$   
731 estimates of *ONESAMP* (mean [95%CI]) in each population are provided in the circles.

732

733 Figure 4 | Schematic diagram of the ABC analysis to compare evolutionary histories and  
734 divergence scenarios generated and tested using the program DIYABC. Each coloured  
735 segment depicts a distinct effective population size. The posterior probability estimated using  
736 the ABC-LDA procedure is provided for each scenario. \* indicates the posterior probability  
737 estimated using the ABC-RF is also provided for the best scenario of each step. See the main

738 text, appendix S1, Table S2-S3 for further details.

739  
740  
741

**Table 1** | Genetic variation at the 11 microsatellites and mtDNA control region loci for each distinct population inferred from the *STRUCTURE* analysis.

|                             | Total               | PY                         | TL                          | XCSS                        | Admix                       |
|-----------------------------|---------------------|----------------------------|-----------------------------|-----------------------------|-----------------------------|
| <b>Microsatellite loci</b>  |                     |                            |                             |                             |                             |
| $N_{Mic.} \pm SD$ (max)     | 148                 | 57.2 ± 0.32 (58)           | 16.0 ± 0.4 (17)             | 16.4 ± 0.36 (17)            | 48.1 ± 1.3 (53)             |
| NA                          | -                   | 1.4%                       | 4.8%                        | 3.7%                        | 9.3%                        |
| $A_r \pm SE$                | -                   | 4.82 ± 0.40                | 5.19 ± 0.52                 | 5.25 ± 0.46                 | 5.93 ± 0.45                 |
| $pA \pm SE$                 | -                   | 0.38 ± 0.09                | 0.55 ± 0.21                 | 0.48 ± 0.12                 | 0.69 ± 0.18                 |
| $H_o \pm SD$                | -                   | 0.60 ± 0.06                | 0.70 ± 0.047                | 0.69 ± 0.05                 | 0.72 ± 0.04                 |
| $H_e \pm SD$                | -                   | 0.62 ± 0.05                | 0.62 ± 0.05                 | 0.63 ± 0.04                 | 0.68 ± 0.03                 |
| $F_{IS} \pm SD$             | -                   | 0.041 ± 0.03 <sup>ns</sup> | -0.123 ± 0.06 <sup>ns</sup> | -0.112 ± 0.03 <sup>ns</sup> | -0.057 ± 0.03 <sup>ns</sup> |
| $M_{GW}^{\dagger}$          | -                   | 0.51 <sup>***</sup>        | 0.46 <sup>**</sup>          | 0.44 <sup>**</sup>          | 0.53 <sup>**</sup>          |
| <b>MtDNA control region</b> |                     |                            |                             |                             |                             |
| $N_{mtDNA}$                 | 129                 | 56                         | 17                          | 16                          | 37                          |
| <i>S</i>                    | 7                   | 2                          | 1                           | 0                           | 5                           |
| <i>Singleton</i>            | 4                   | 0                          | 0                           | 0                           | 3                           |
| <i>Shared P.</i>            | 3                   | 2                          | 1                           | 0                           | 2                           |
| <i>#hap.</i>                | 7                   | 3                          | 2                           | 1                           | 5                           |
| <i>Hd</i>                   | 0.57                | 0.53                       | 0.22                        | 0                           | 0.62                        |
| $\pi$ (per site, %)         | 0.112               | 0.096                      | 0.037                       | 0                           | 0.150                       |
| $\theta_W$ (per site, %)    | 0.216               | 0.073                      | 0.050                       | 0                           | 0.201                       |
| $D^{\ddagger}$              | -1.08 <sup>ns</sup> | 0.54 <sup>ns</sup>         | -0.49 <sup>ns</sup>         | 0                           | -0.64 <sup>ns</sup>         |

742  
743  
744  
745  
746  
747  
748  
749  
750  
751  
752  
753

$N_{Mic.}$ , microsatellite average sample size (max); NA: average proportion of missing data per locus,  $A_r$ : allelic richness (estimated for a sample size of 26 individuals);  $pA$ : Private allelic richness (estimated for a sample size of 3 individuals);  $H_o$  and  $H_e$ : observed and expected heterozygosity;  $F_{IS}$ : Inbreeding coefficient;  $M_{GW}$ , M of Garza and Williamson<sup>34</sup>;  $N_{mtDNA}$ , MtDNA sample size; *S*, number of segregating sites; *Singleton*: rare mutation observed only in one sequence among all; *Share P.*, shared polymorphism (mutation observed in at least two or more sequences) also known as parsimony informative site; *#hap.*, number of haplotypes; *Hd*, haplotype diversity;  $\pi$ , nucleotide diversity;  $\theta_W$ , theta from *S* or Theta-Watterson; *D*, Tajima's *D*. † The significance level of the  $M_{GW}$  statistic was evaluated in DIYABC<sup>78</sup> using  $1 \times 10^6$  coalescent simulations under a scenario of constant effective population size. The P-value indicate the proportion of simulations which provide a value below the observed one. ‡ The significance of *D* values was estimated using 10 000 coalescent simulations in DNAsp<sup>73</sup>.  
ns: not significant (p-value > 0.05); \* p-value ≤ 0.05; \*\* p-value ≤ 0.01; \*\*\* p-value ≤ 0.001



754 **Table 2** | Genetic differentiation between populations identified by Structure. Below the diagonal, pairwise  
 755  $F_{ST}$  values and their 95% CI for microsatellite loci are provided as well as their associated P-value. Above the  
 756 diagonal,  $F_{ST}$  values are provided for the mtDNA locus with its corresponding P-value.  
 757

| $F_{ST-mic}$ \ $F_{ST-mtDNA}$ | XCSS                      | PY                        | TL                        | Admix               |
|-------------------------------|---------------------------|---------------------------|---------------------------|---------------------|
| XCSS                          | –                         | 0.590***                  | 0.875***                  | 0.446***            |
| PY                            | 0.070***<br>[0.038-0.104] | –                         | 0.109*                    | 0.011**             |
| TL                            | 0.052***<br>[0.034-0.070] | 0.050***<br>[0.024-0.075] | –                         | 0.131 <sup>ns</sup> |
| Admix                         | 0.029***<br>[0.011-0.047] | 0.023***<br>[0.014-0.032] | 0.023***<br>[0.010-0.037] | –                   |

758

759

760

761

ns: not significant (p-value > 0.05); \* p-value ≤ 0.05; \*\* p-value ≤ 0.01; \*\*\* p-value ≤ 0.001

762 **Table 3 |** Effective population size ( $N_e$ ) estimated in each population of the Yangtze finless porpoise.  
763 Values have been calculated using an estimator based on linkage disequilibrium between loci in  
764 *NeEstimator*<sup>30</sup>, using an ABC approach in *ONESAMP*<sup>31</sup>, and using DIYABC under SC2  
765

|                                                    | <b>XCSS</b>         | <b>TL</b>            | <b>PY</b>            | <b>Admix</b> | <b>Total</b> |
|----------------------------------------------------|---------------------|----------------------|----------------------|--------------|--------------|
| <b><i>LD-NeEstimate</i></b><br><i>Mean [95%CI]</i> | 16 [7-53]           | 56 [18-∞]            | 92 [45-486]          | 86 [45-308]  | 251          |
| <b><i>ONESAMP</i></b><br><i>Mean [95%CI]</i>       | 22 [11-26]          | 18 [15-28]           | 62 [45-115]          | 80 [56-142]  | 182          |
| <b><i>DIYABC</i></b><br><i>Mode (mean) [95%CI]</i> | 14 (42)<br>[7 – 95] | 32 (55)<br>[11 – 98] | 35 (50)<br>[11 – 66] | -            | -            |

766  
767

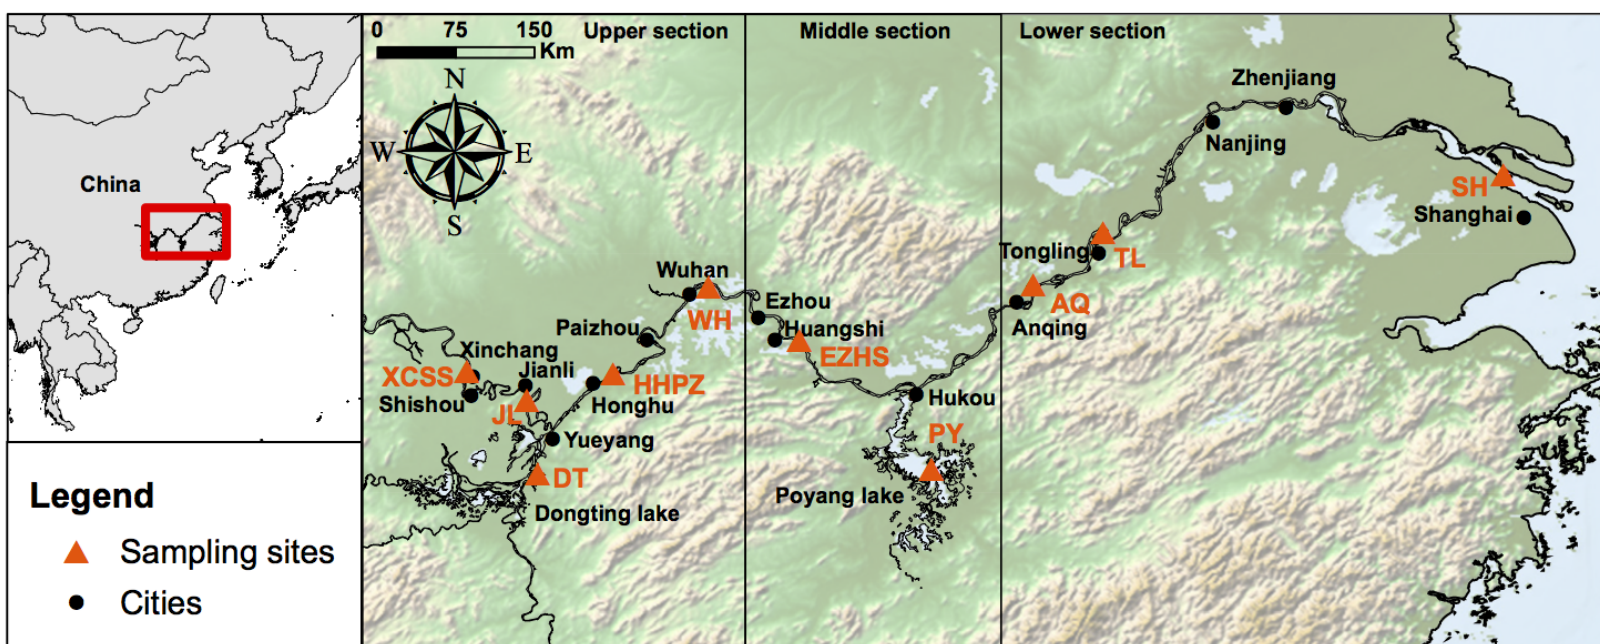



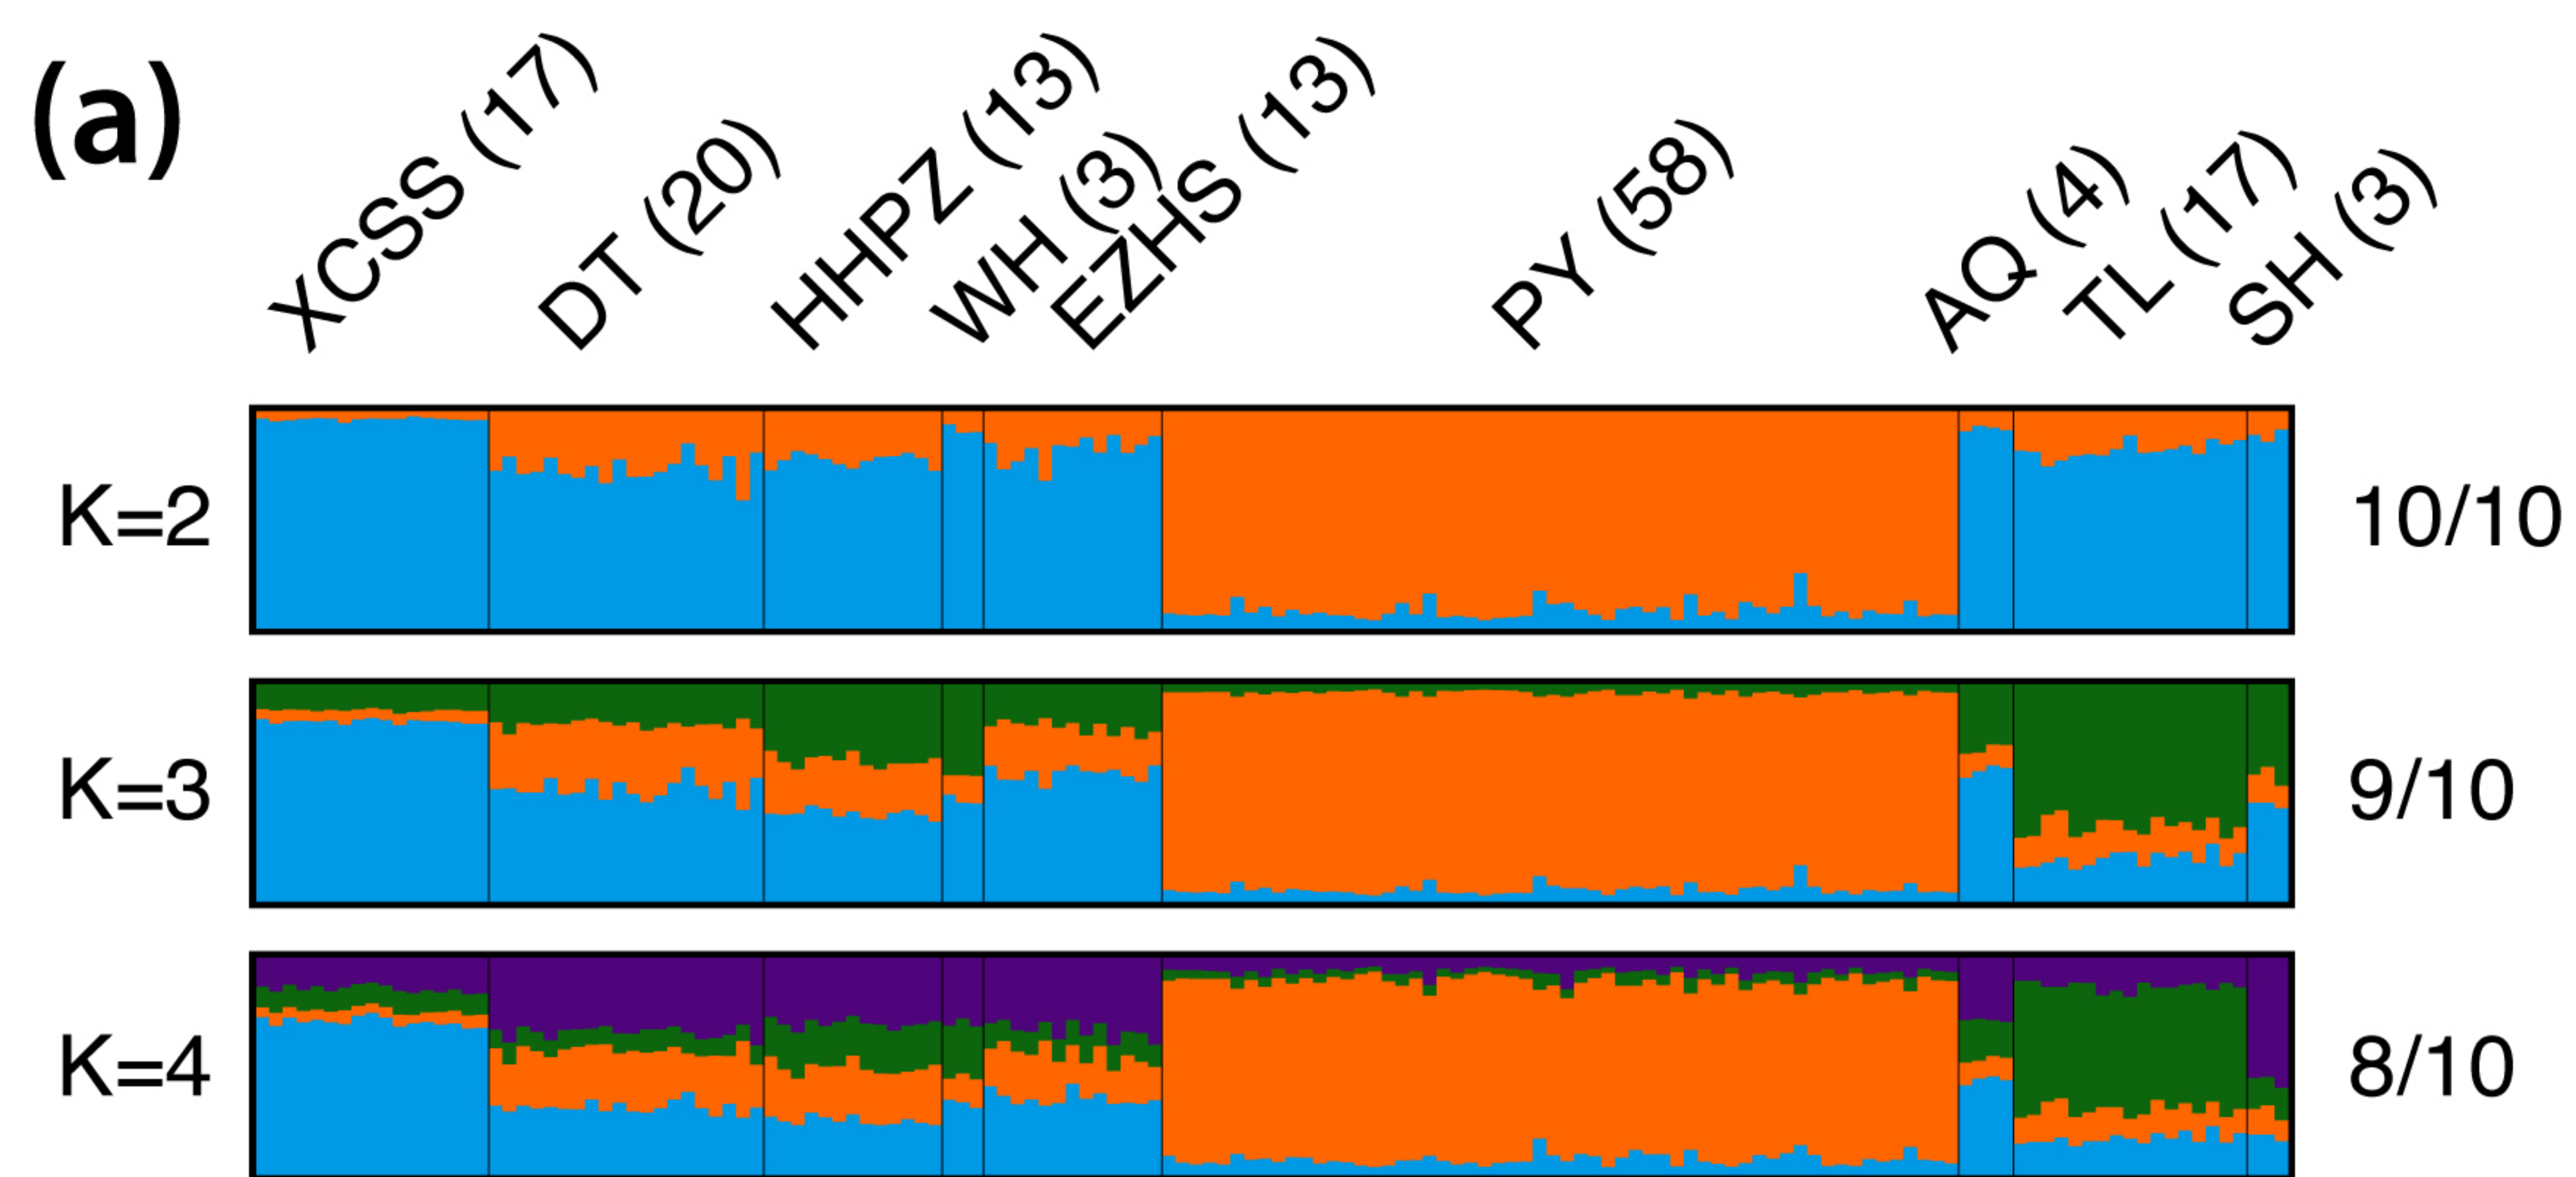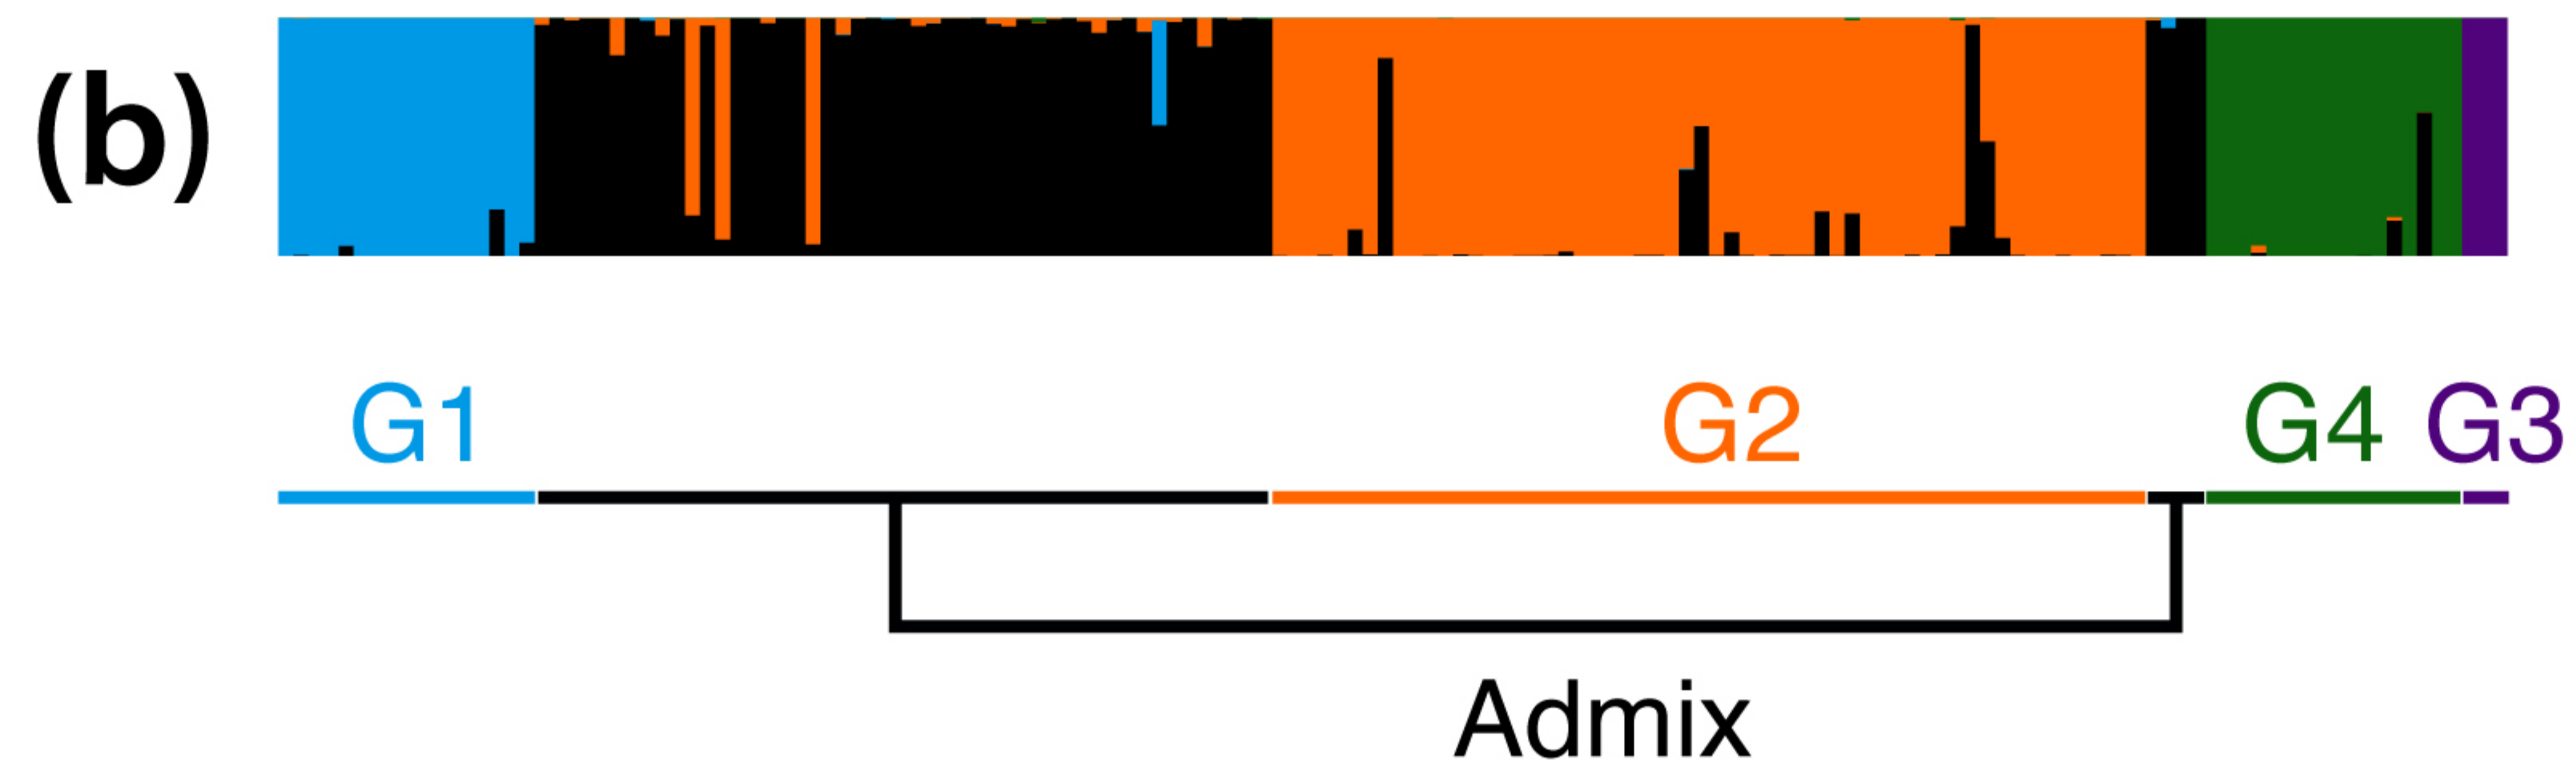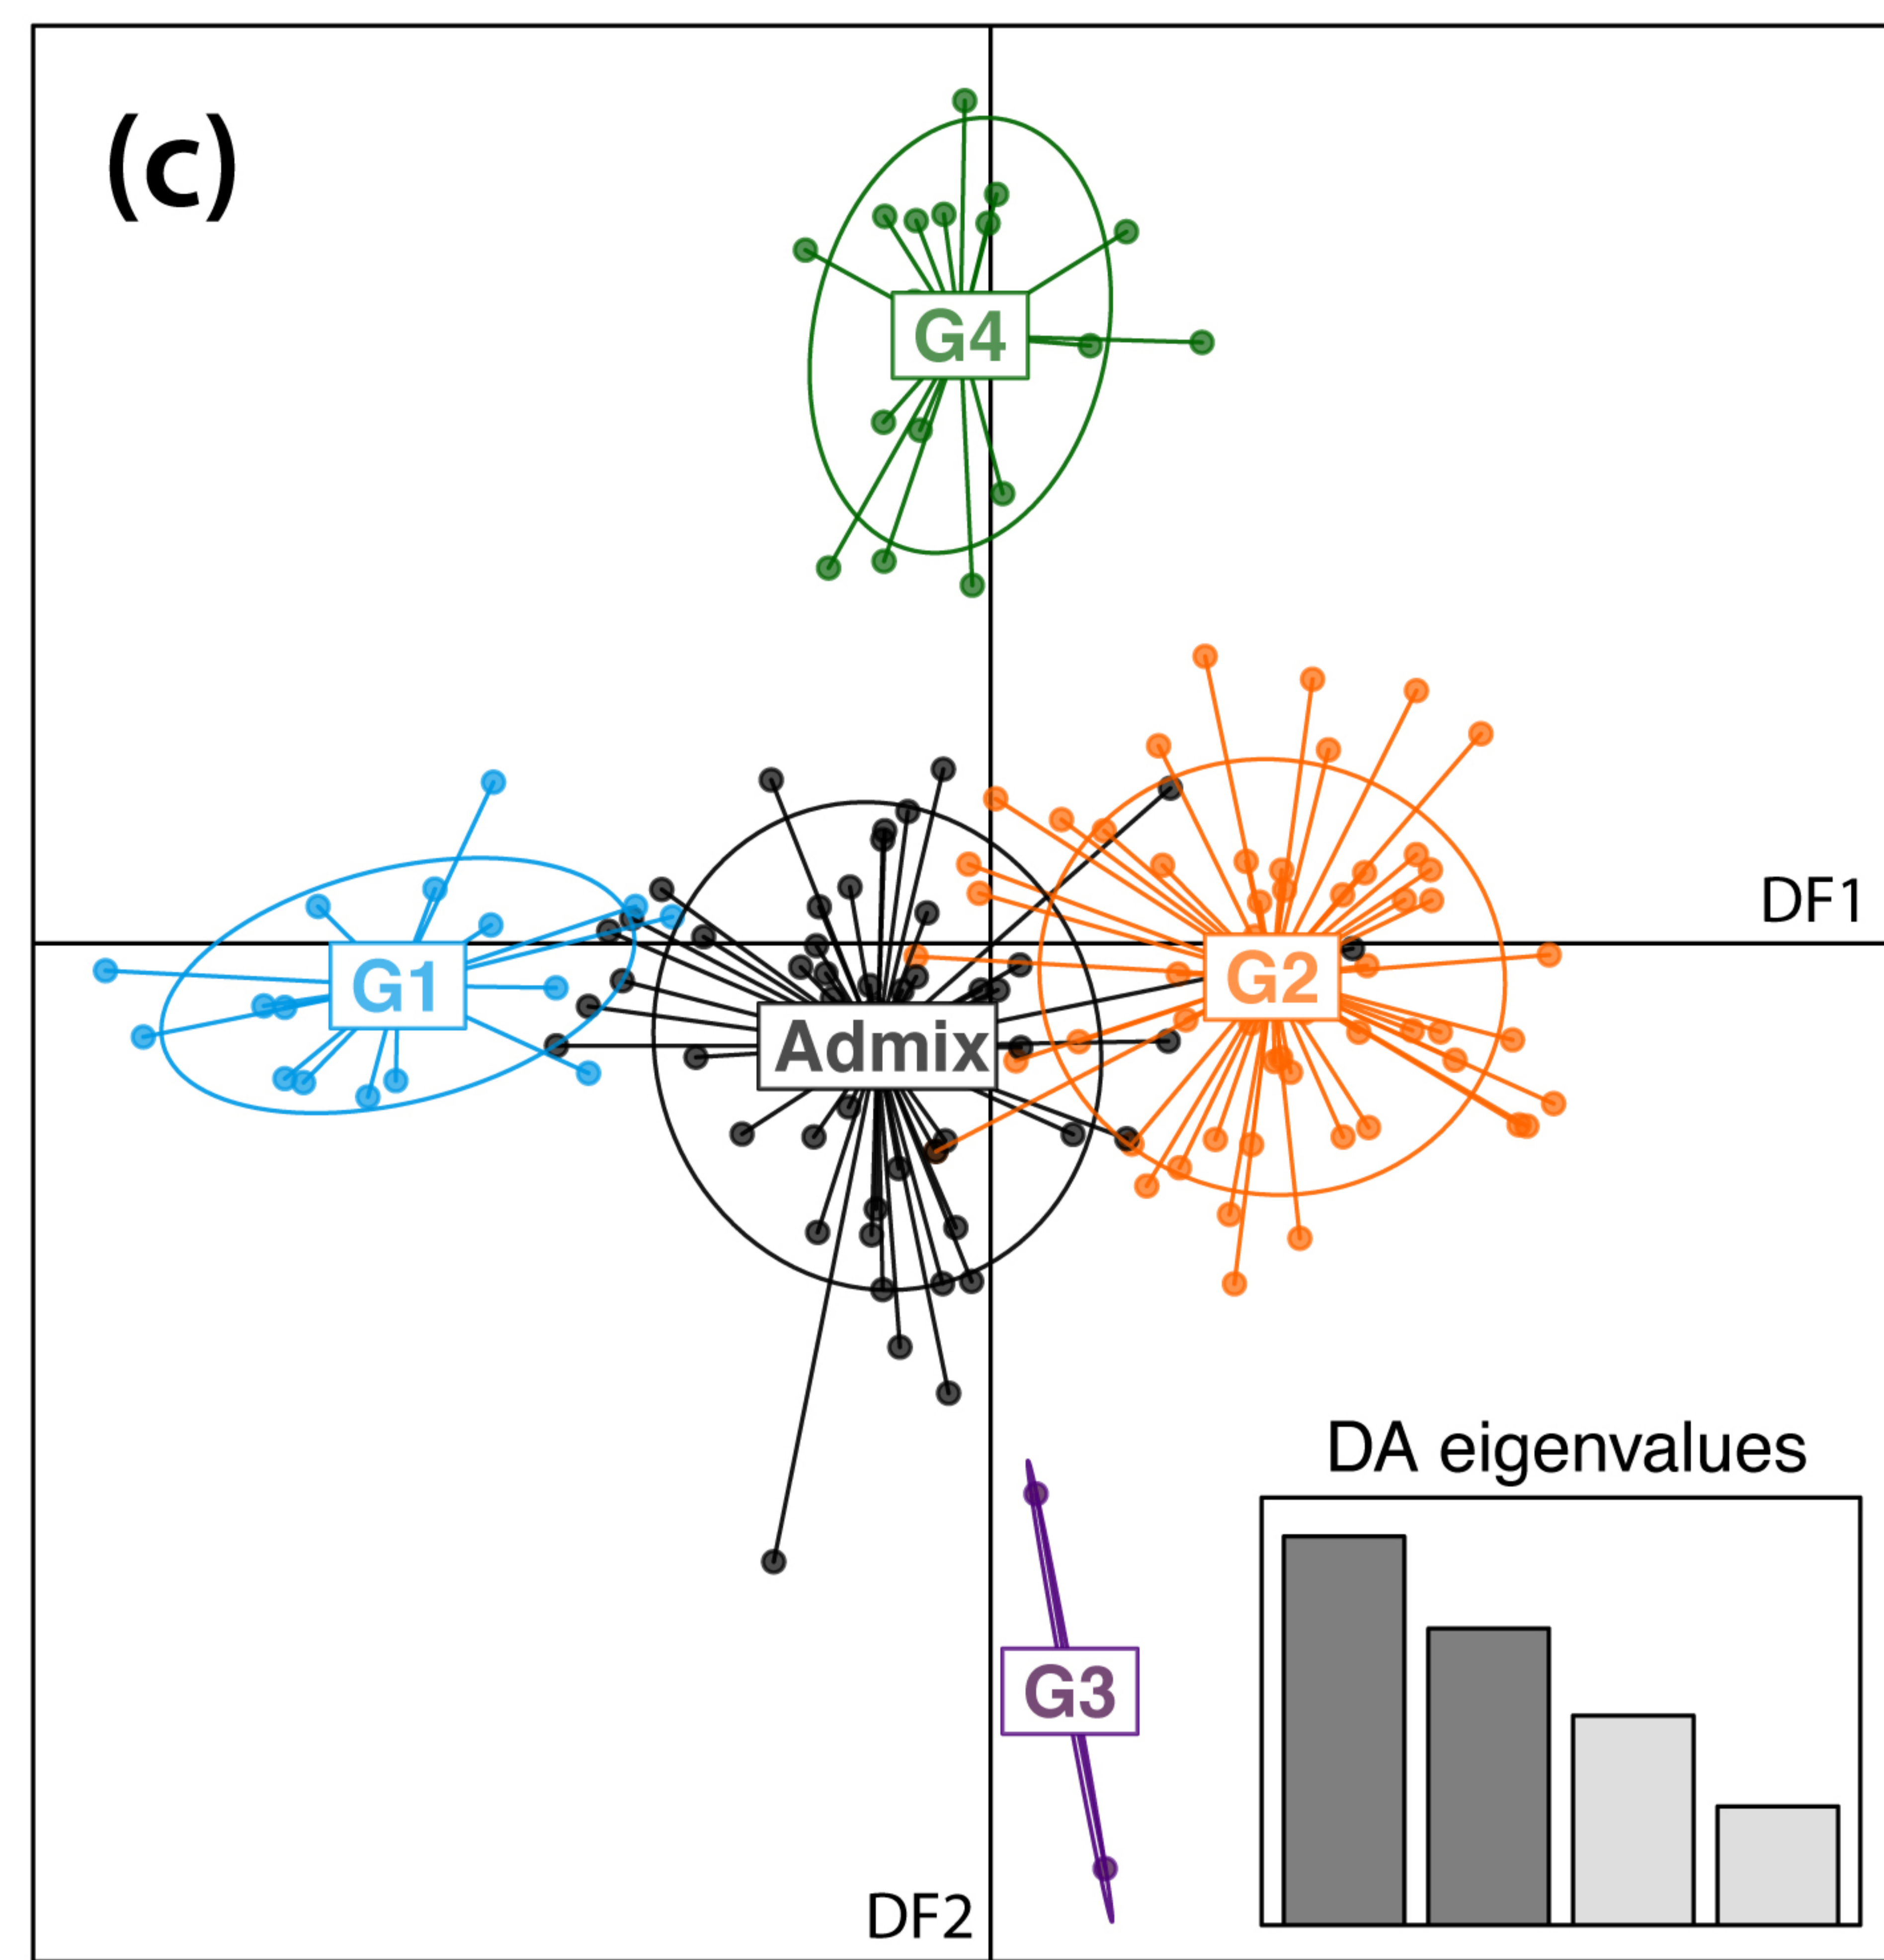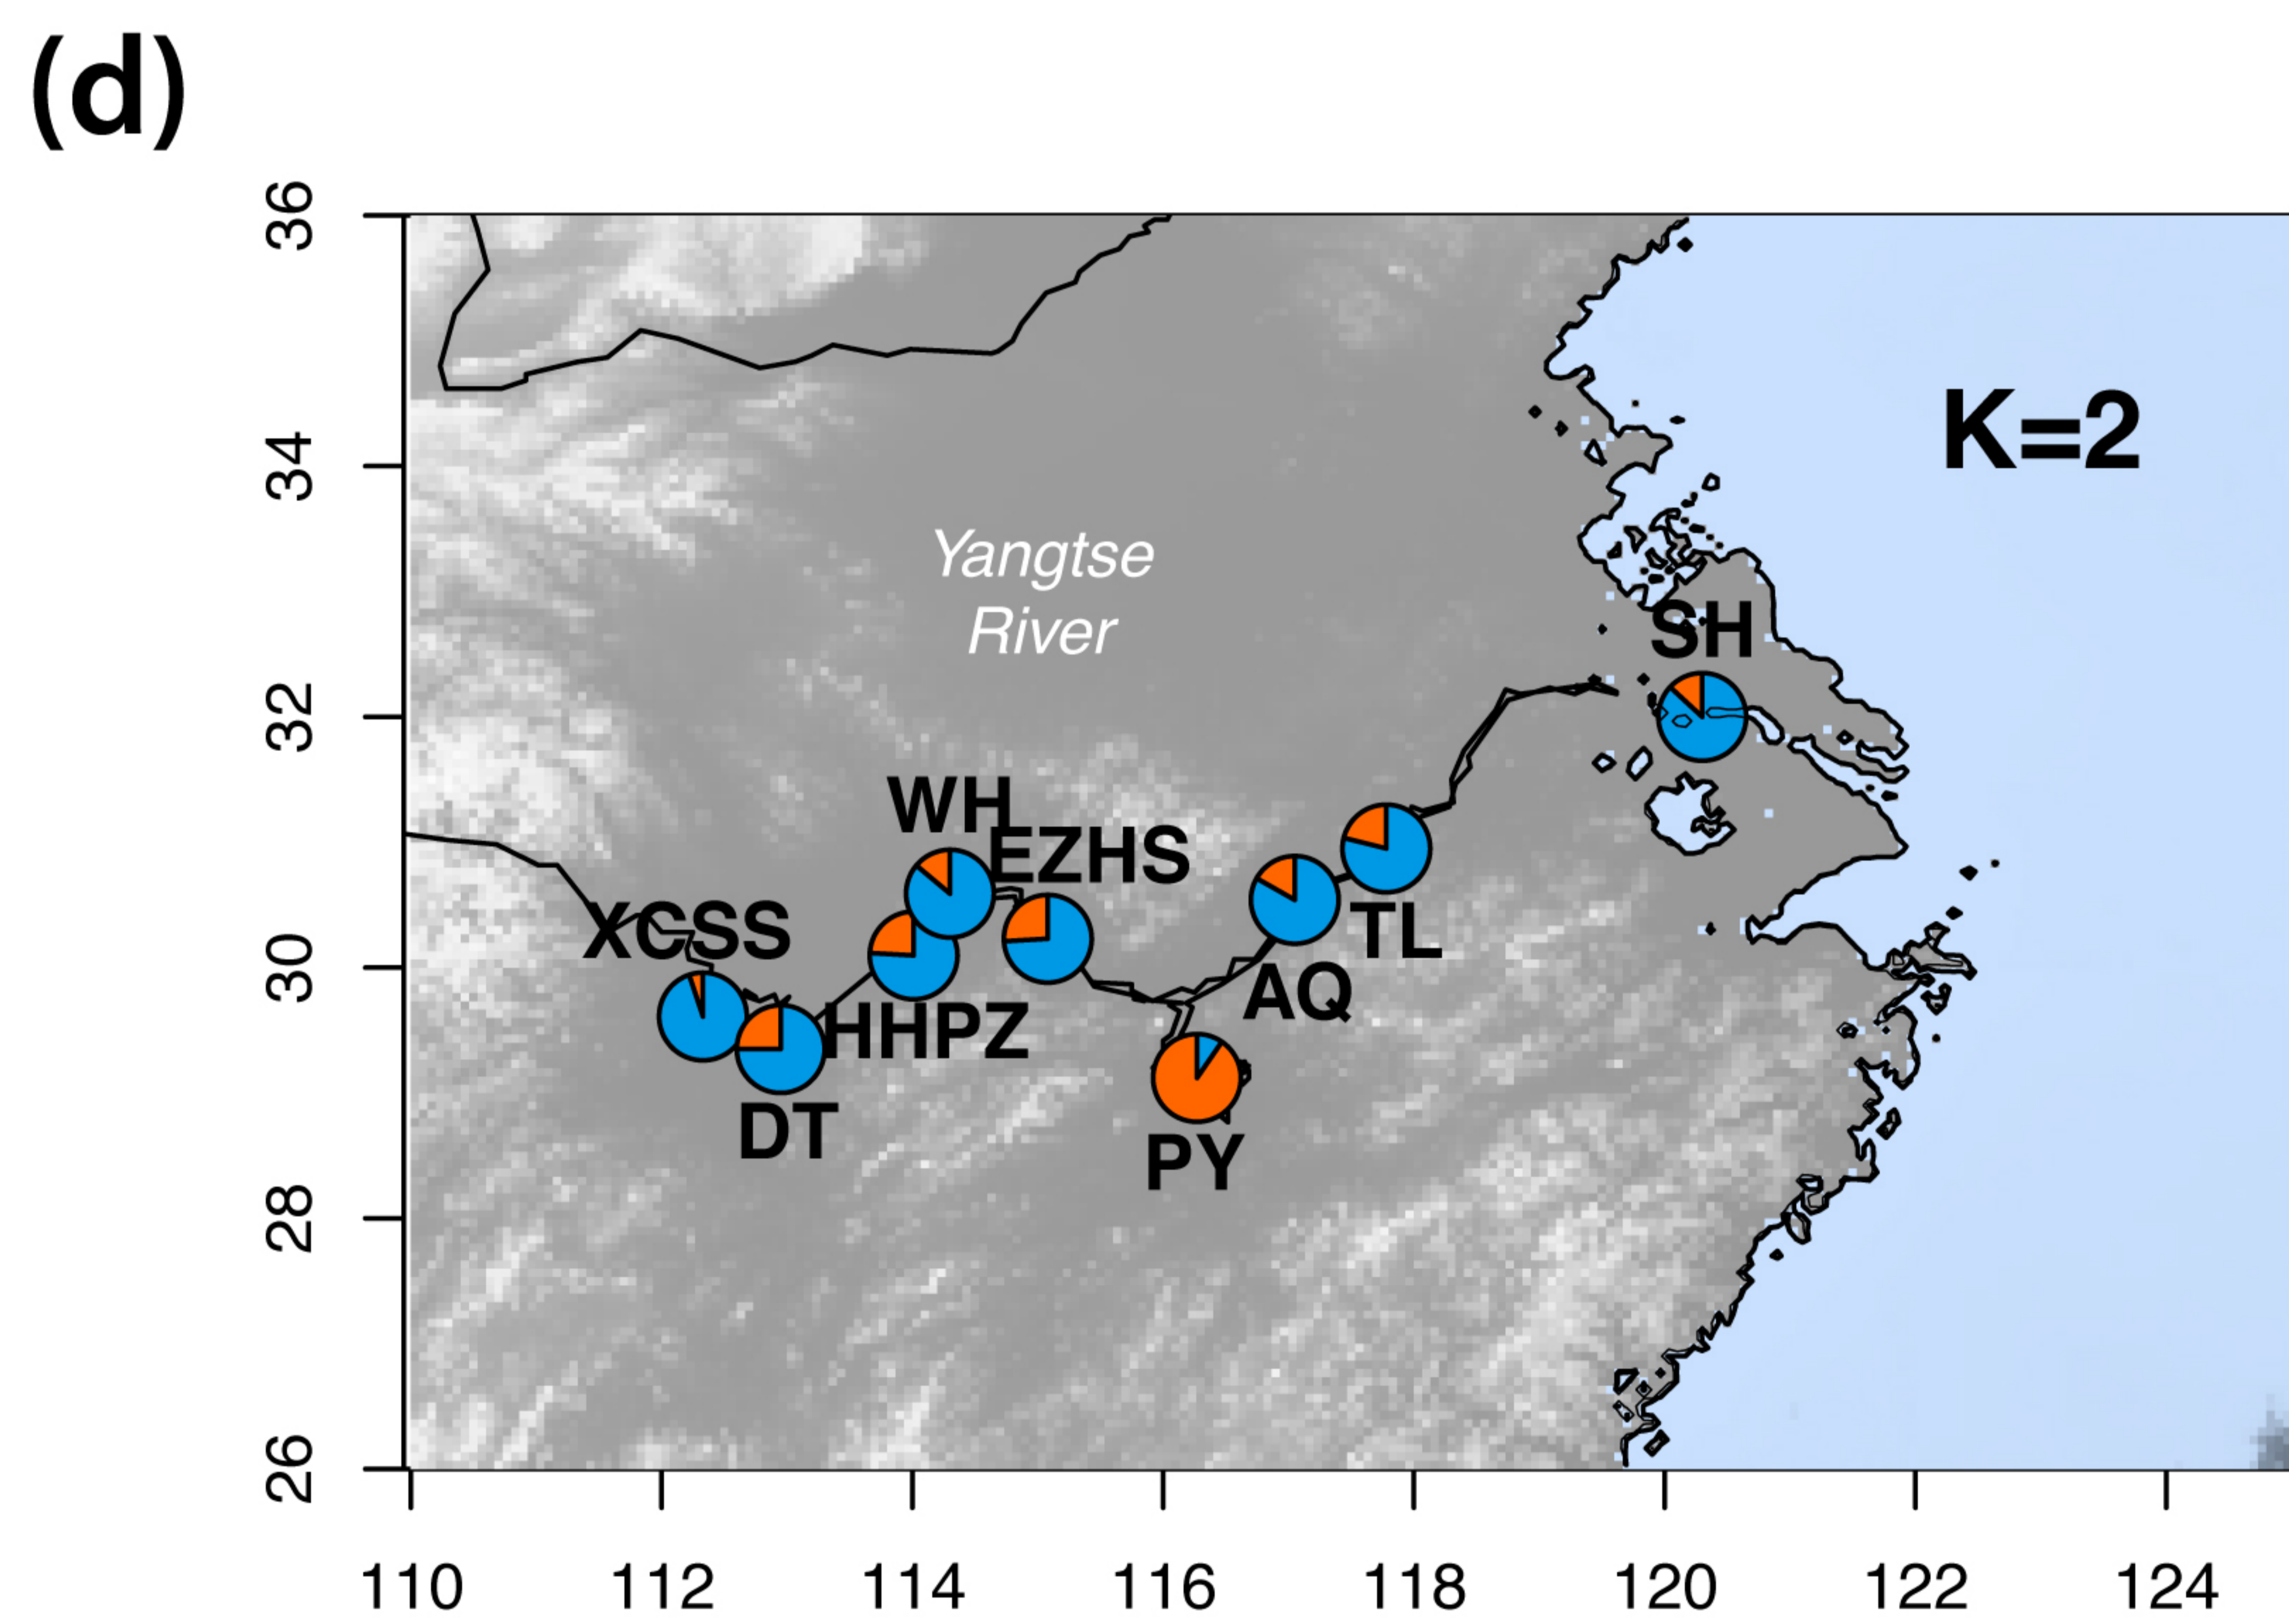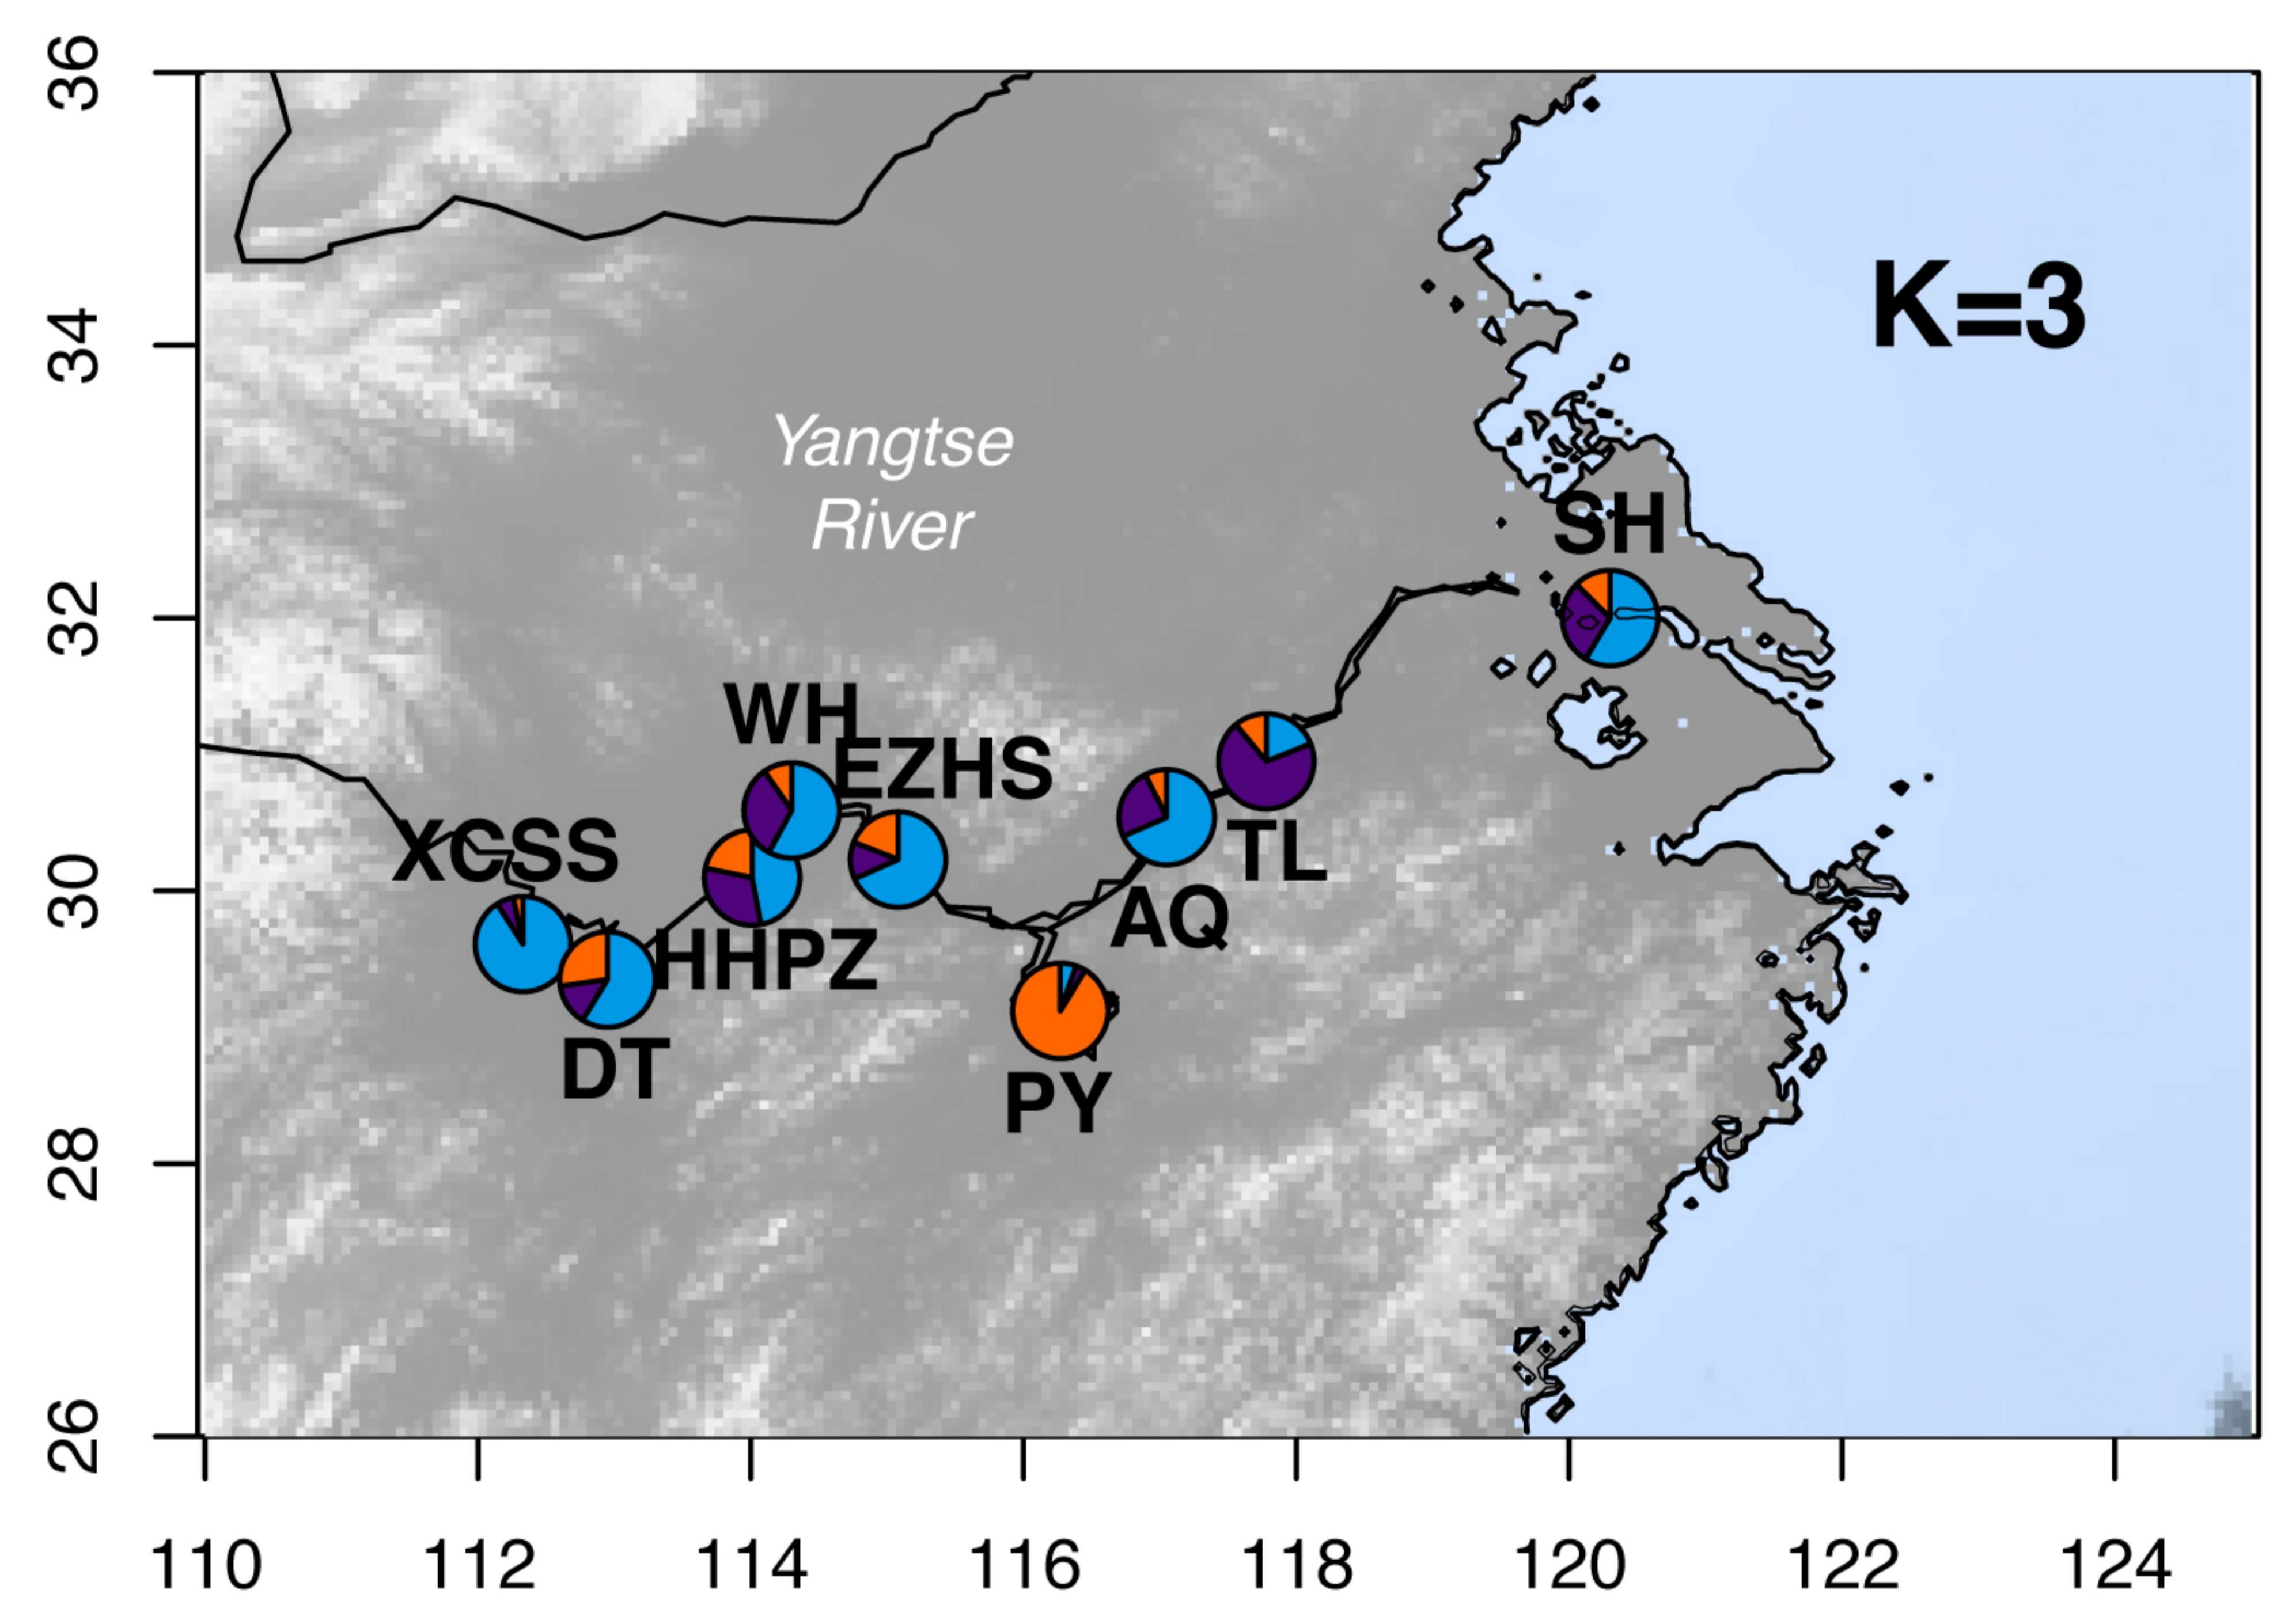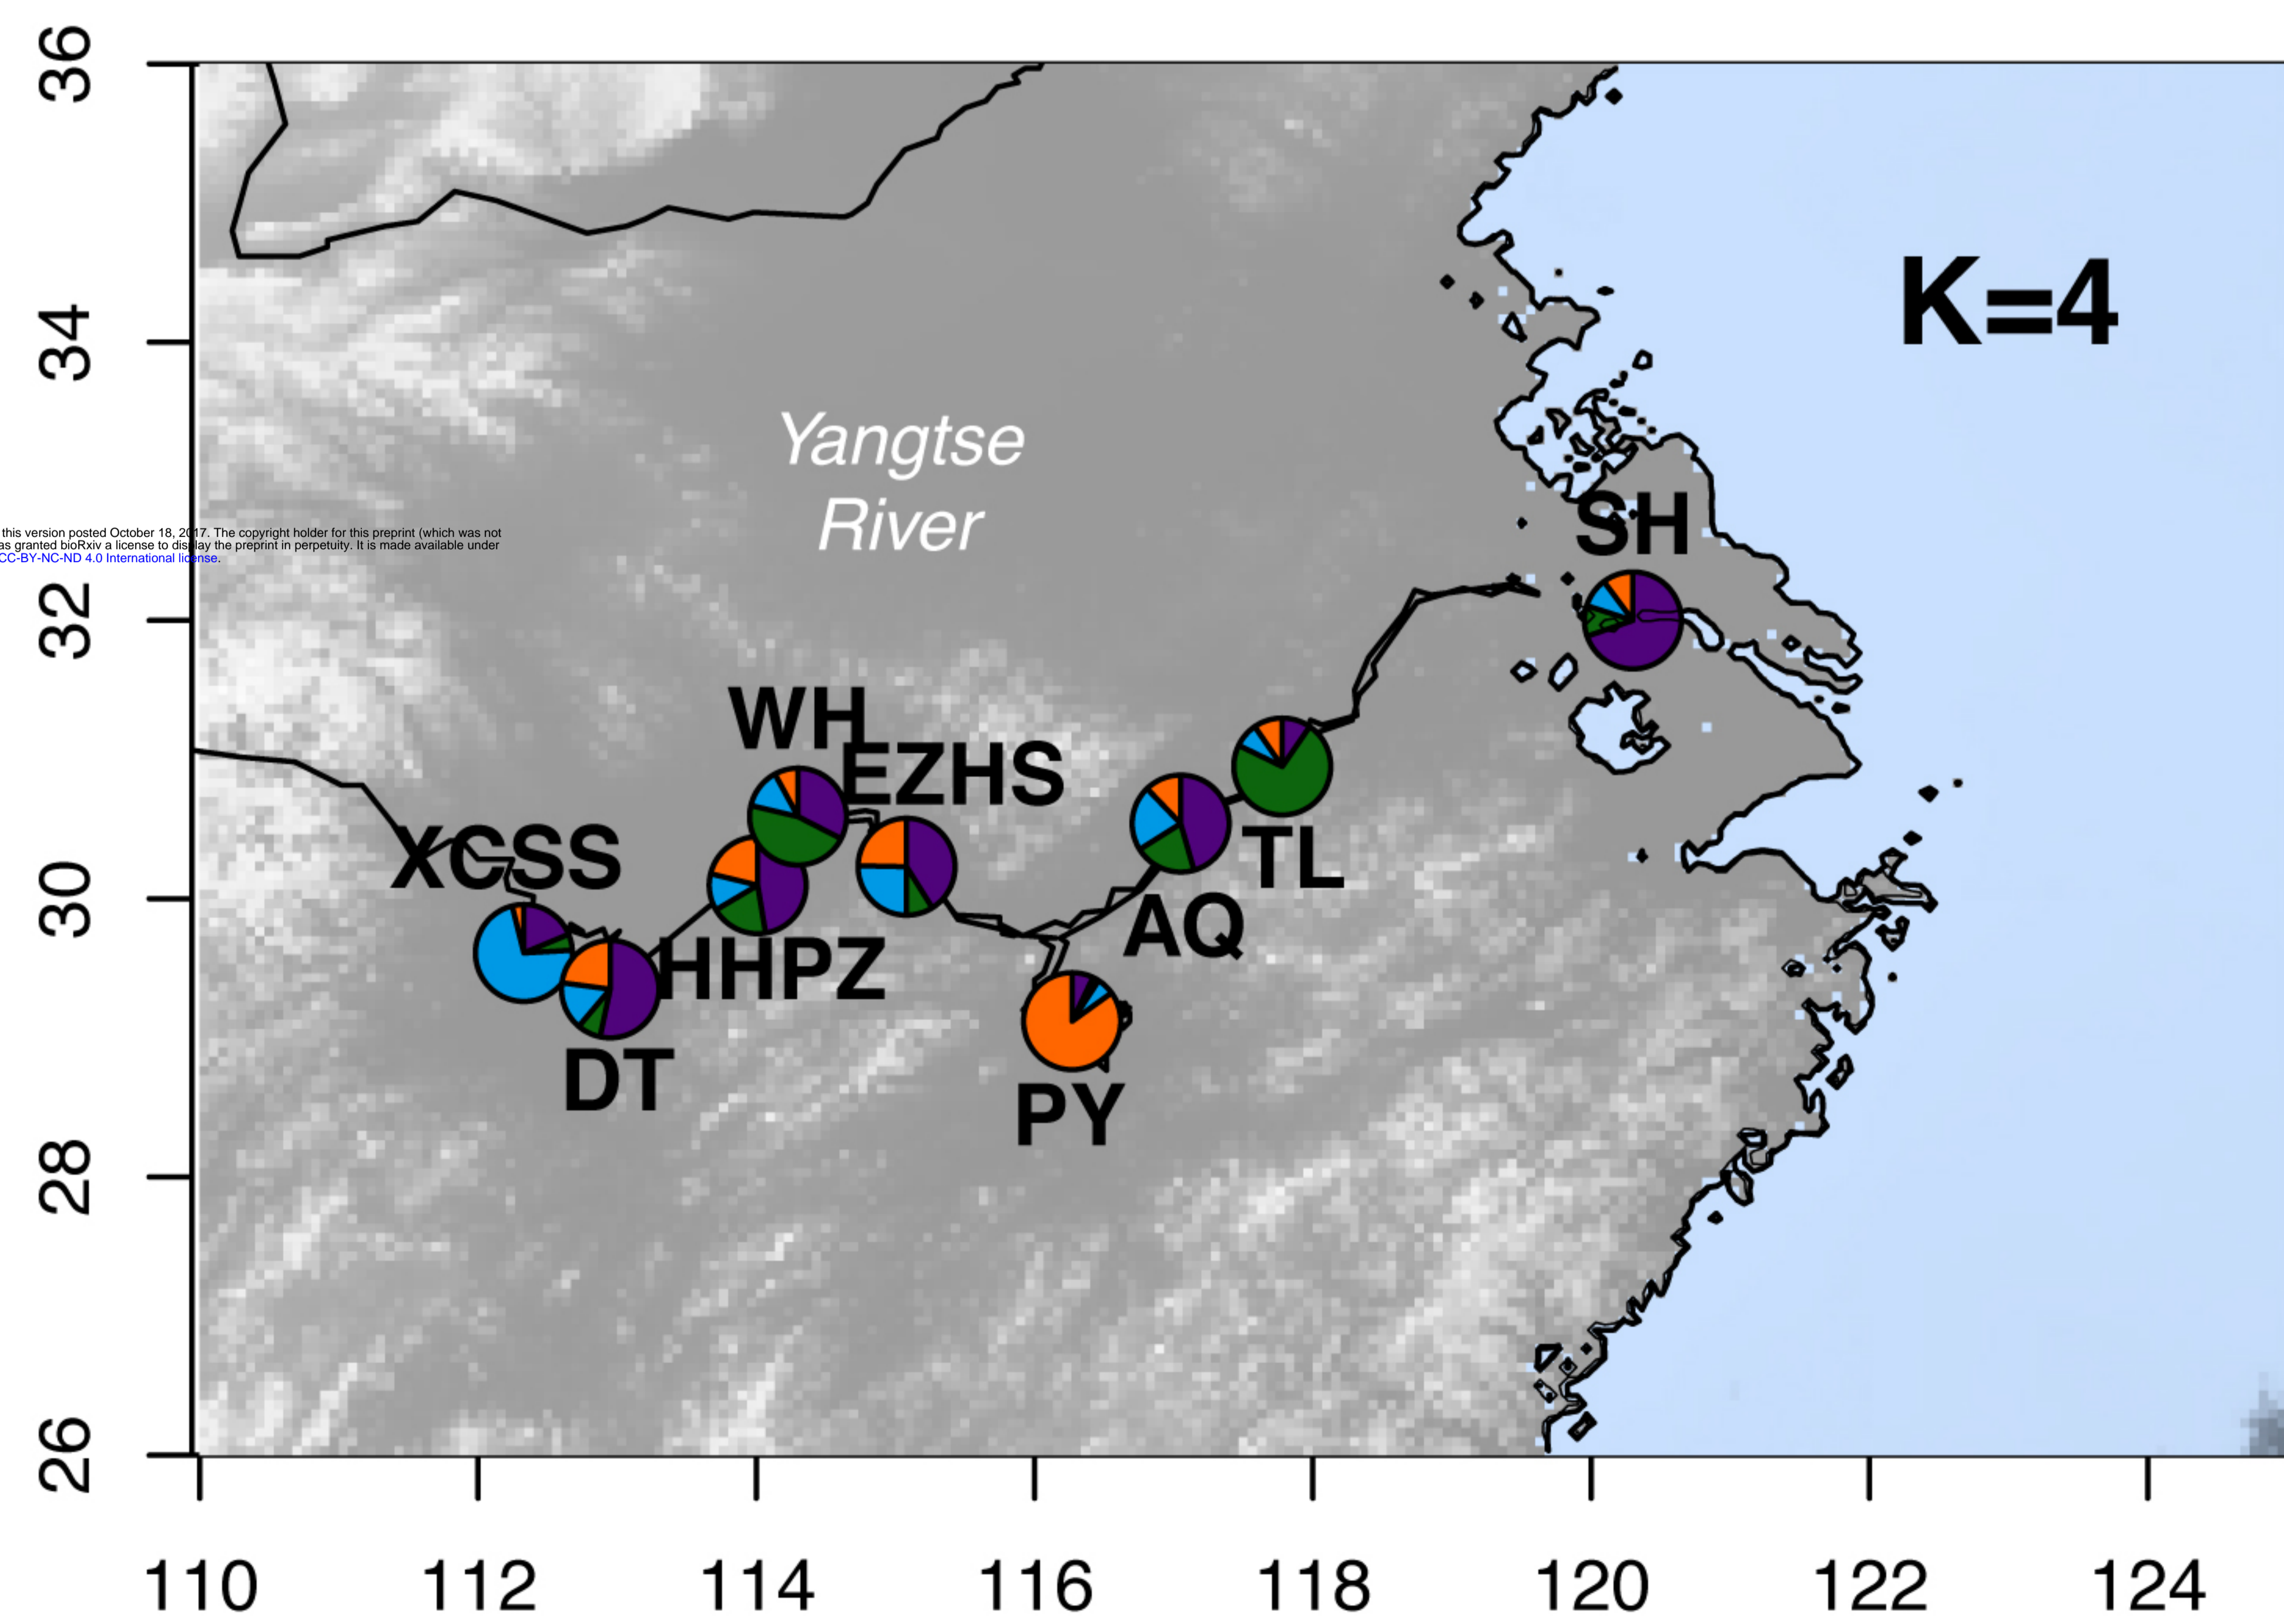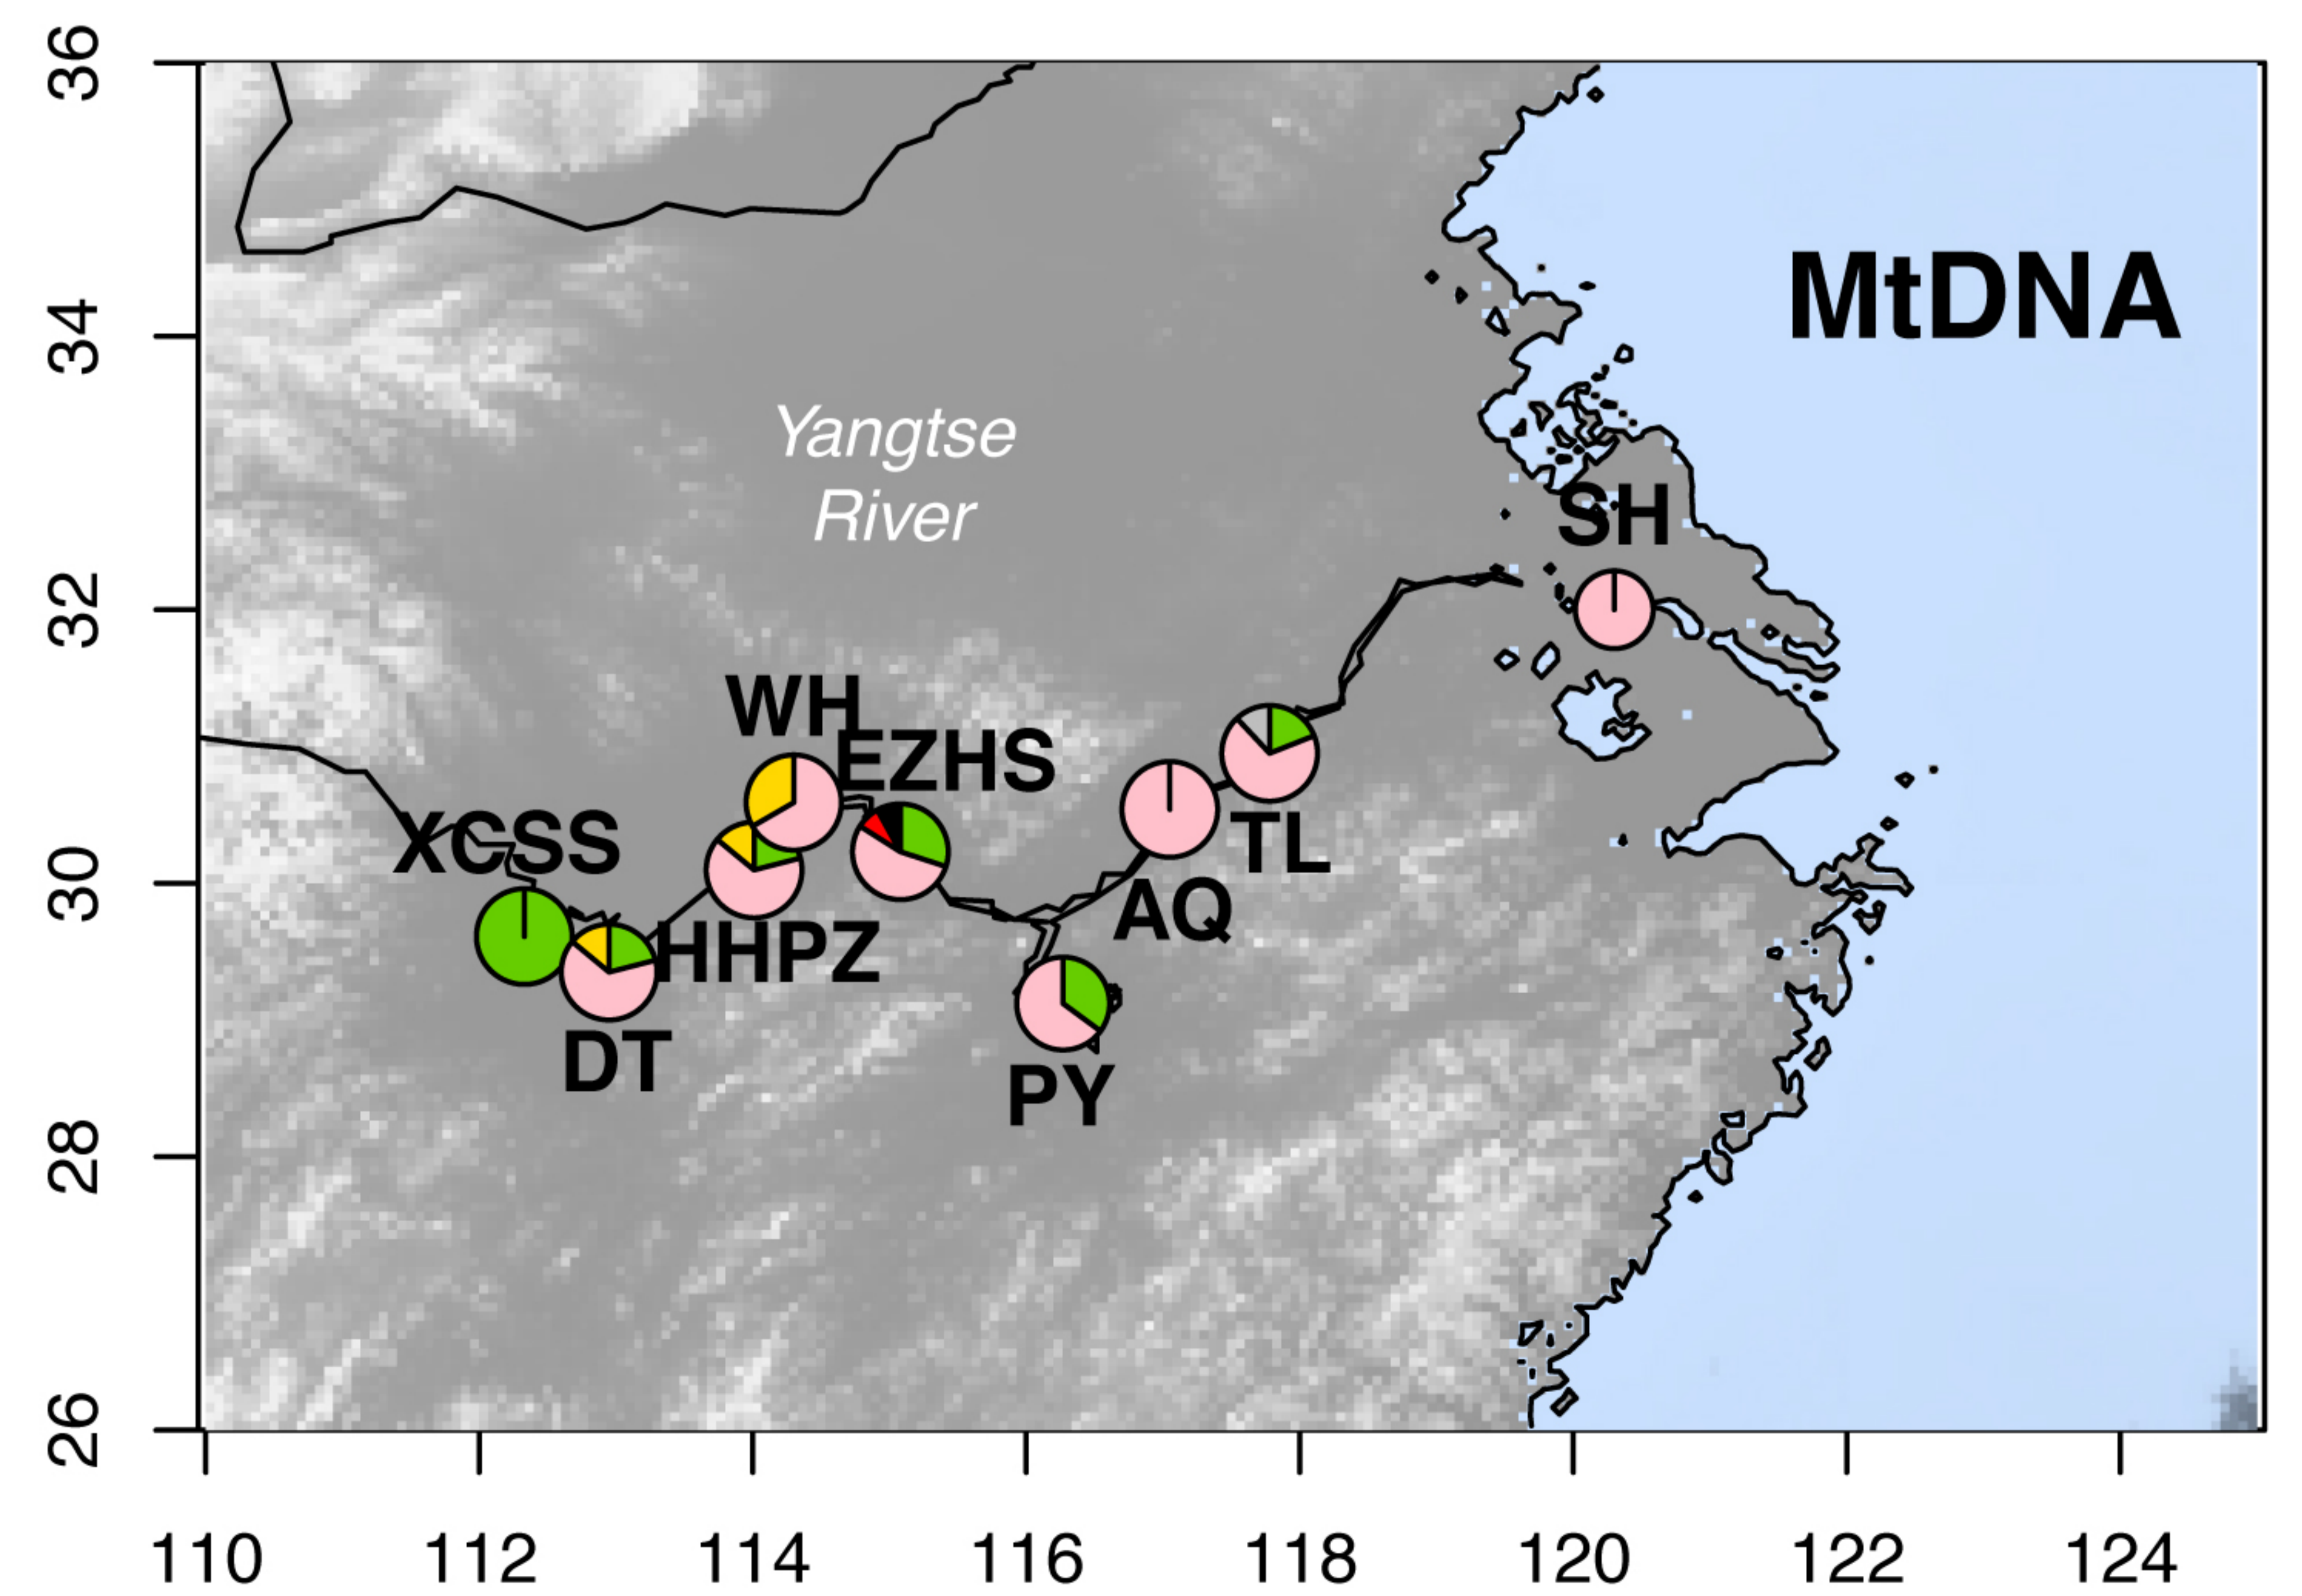



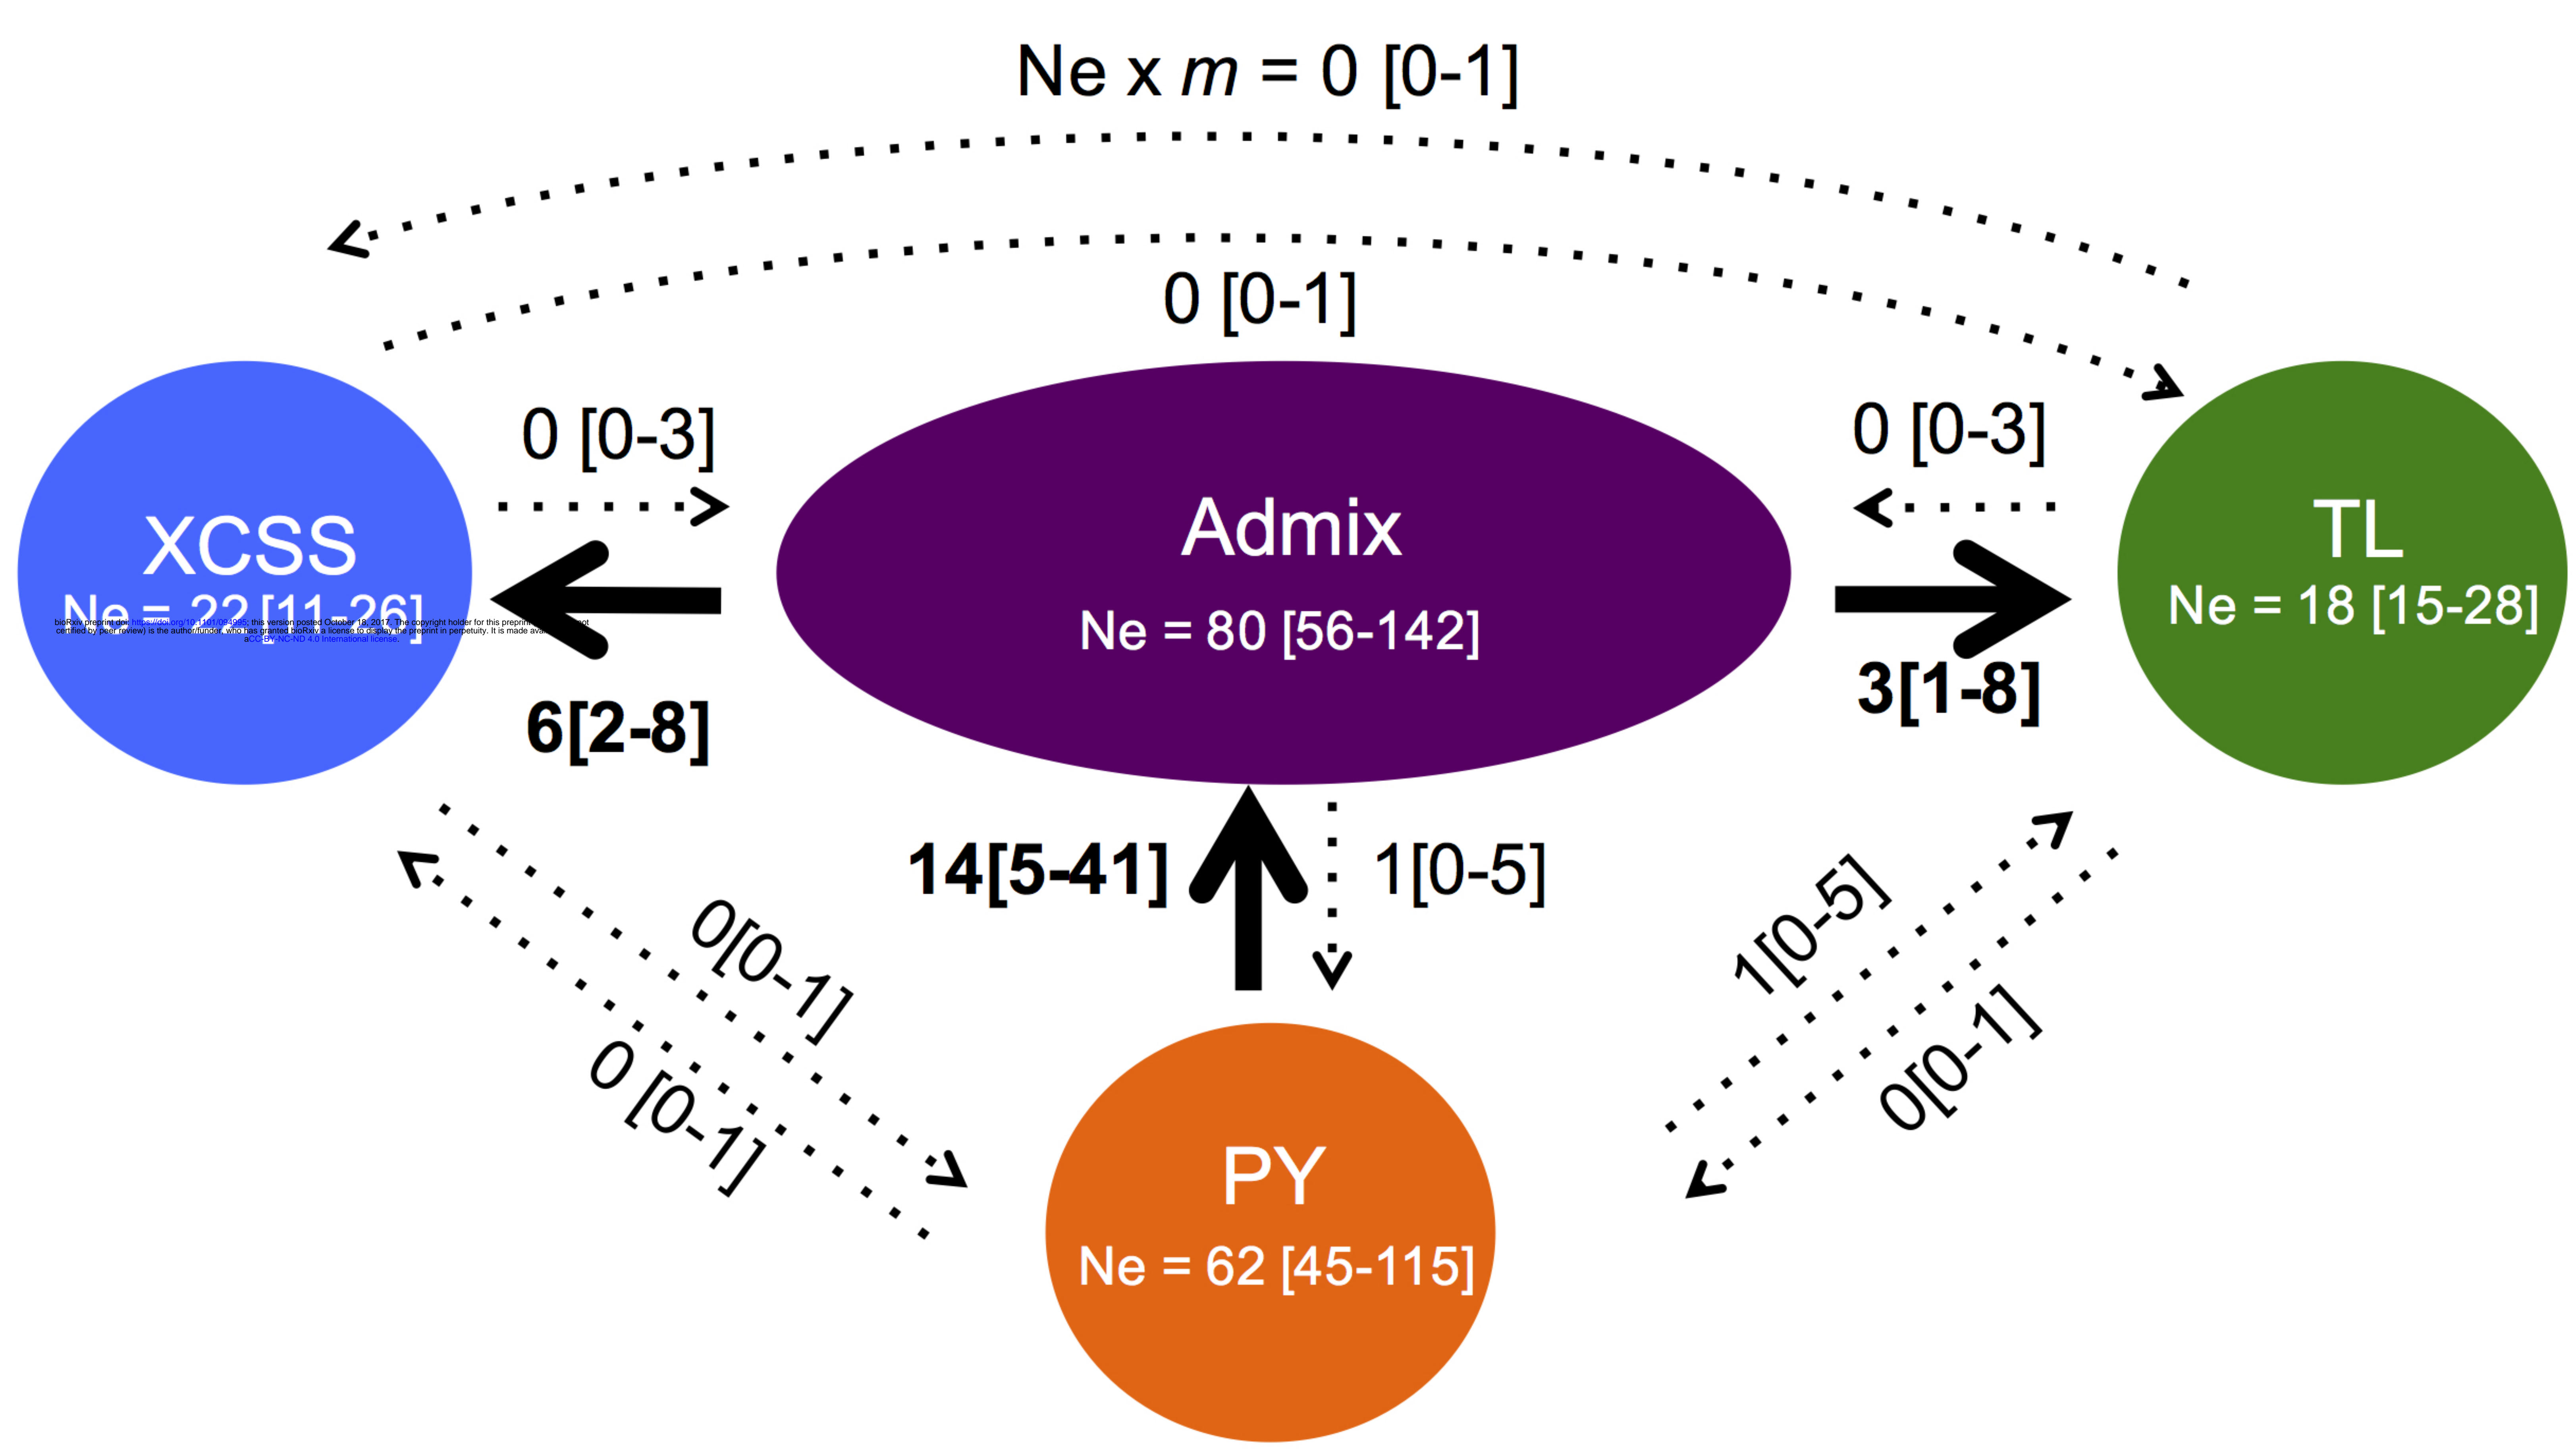



# (a) Select topology

# (b) Test of population size change

## (i) Bottleneck

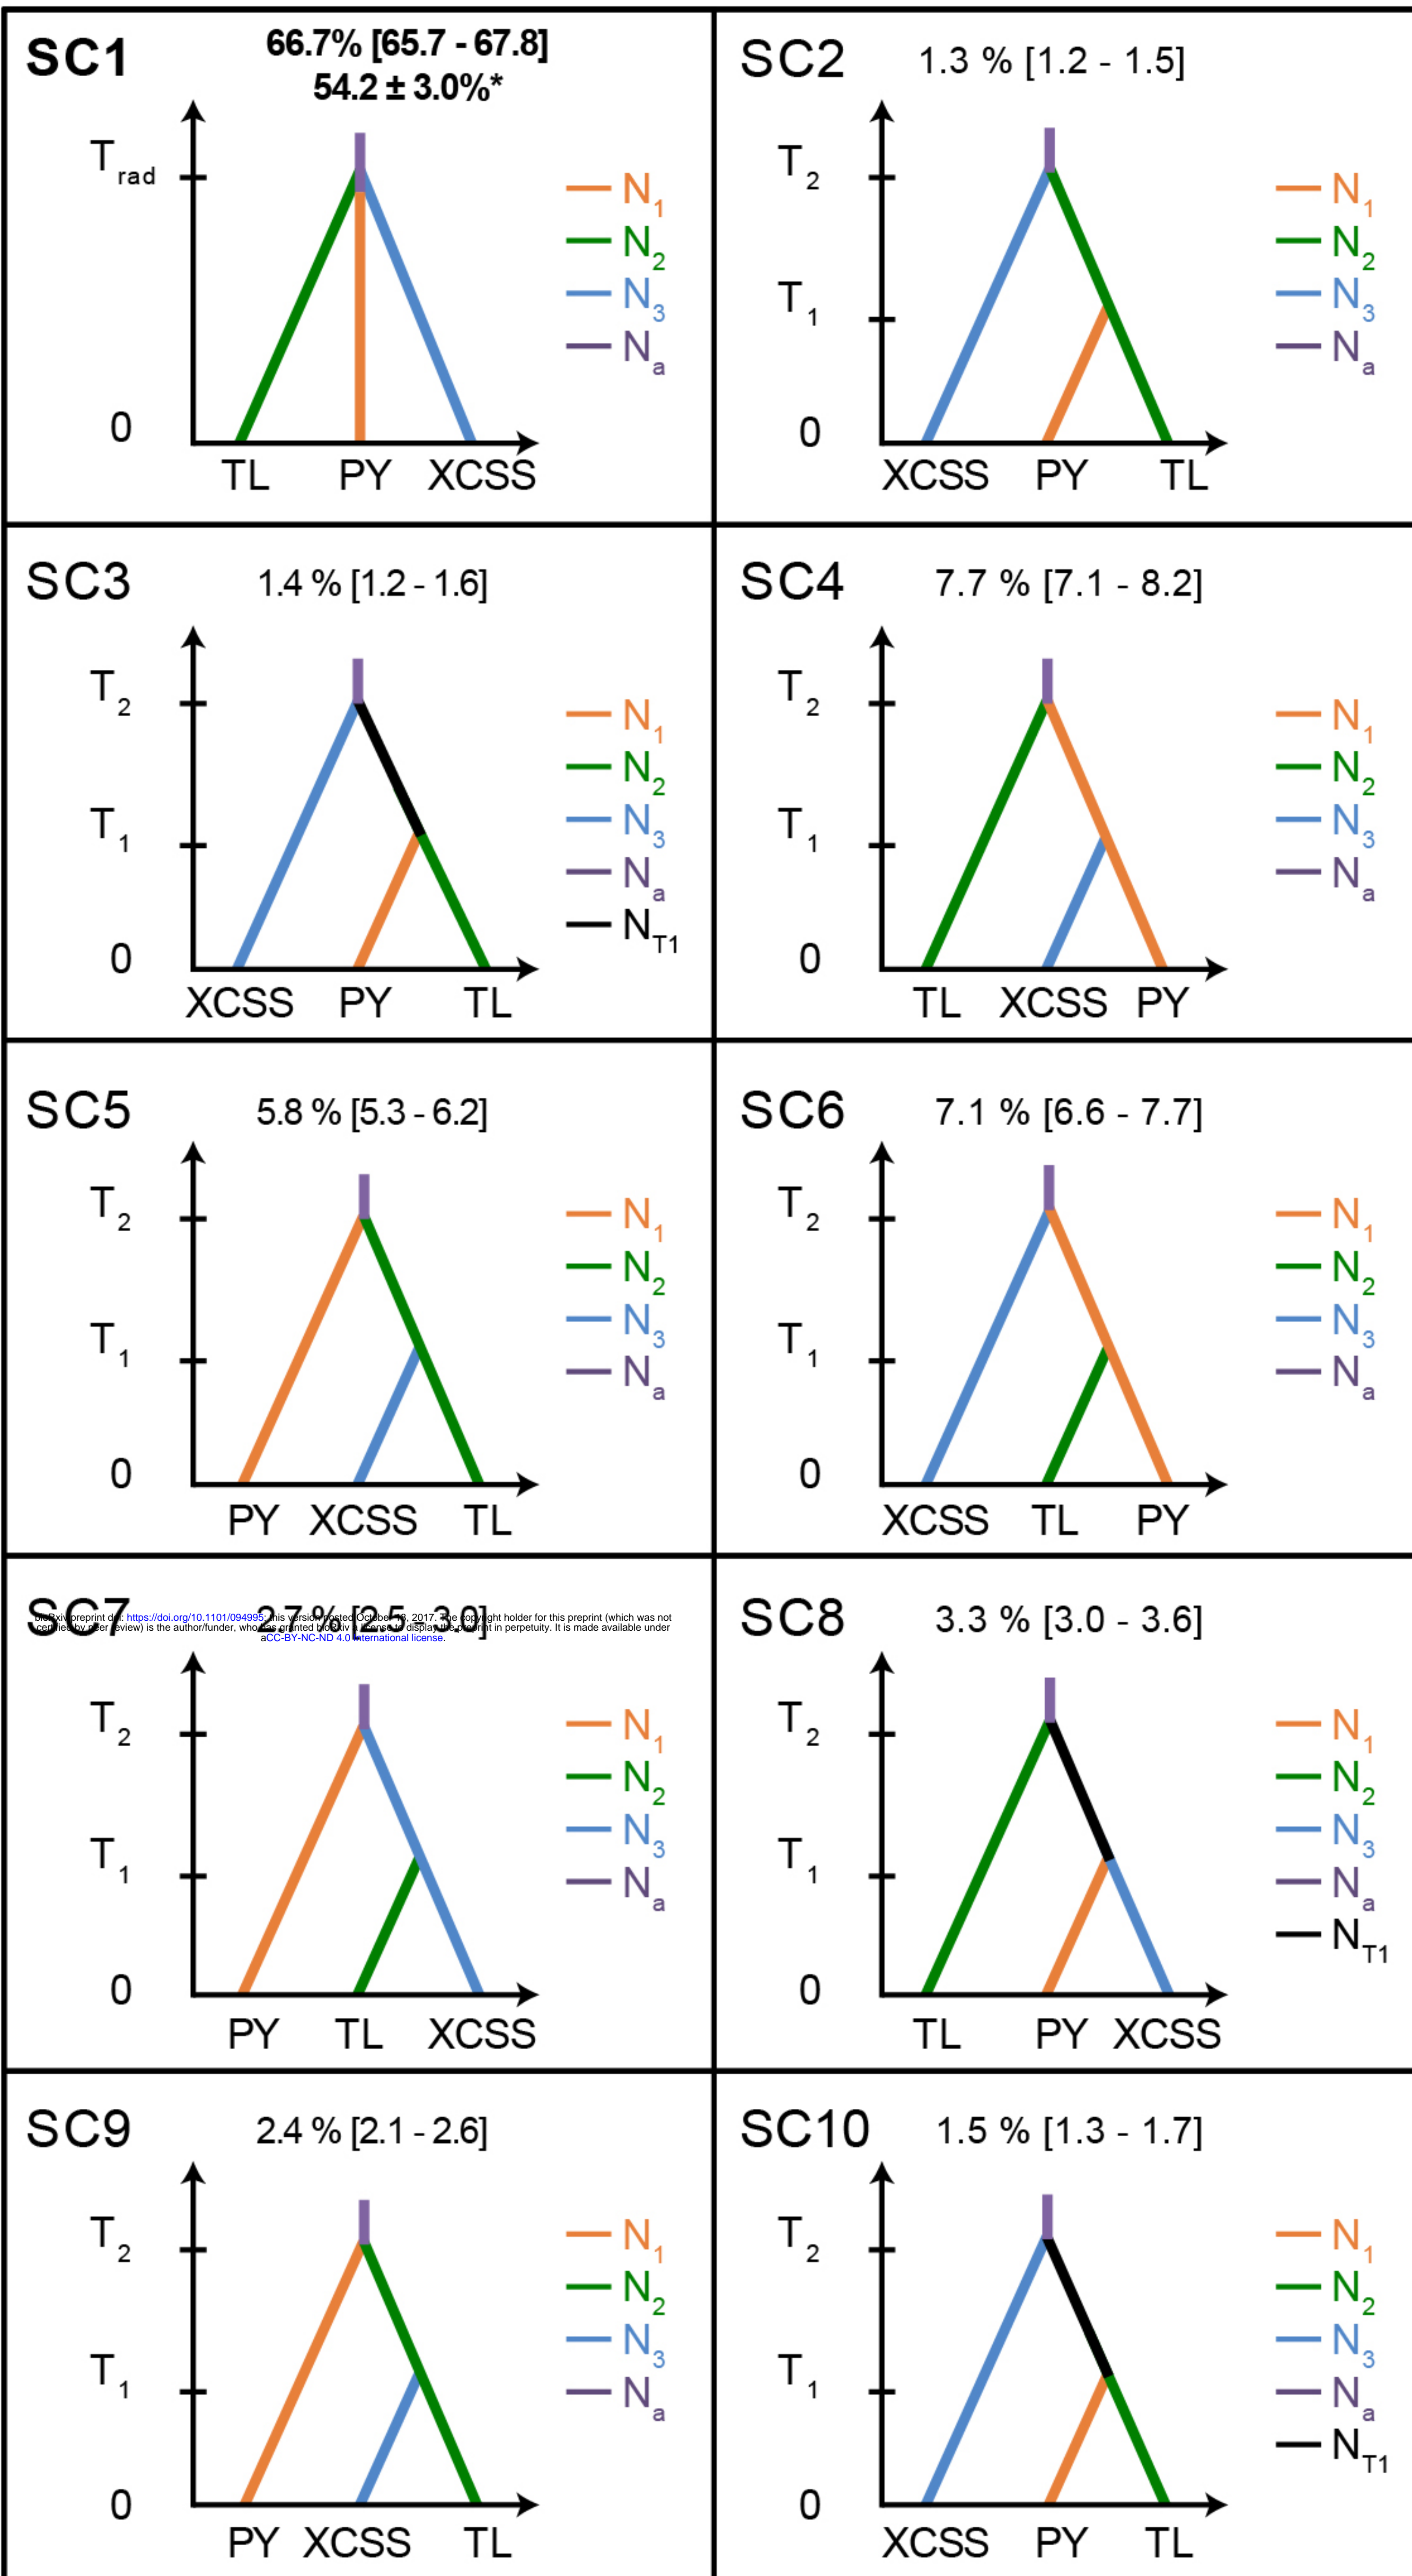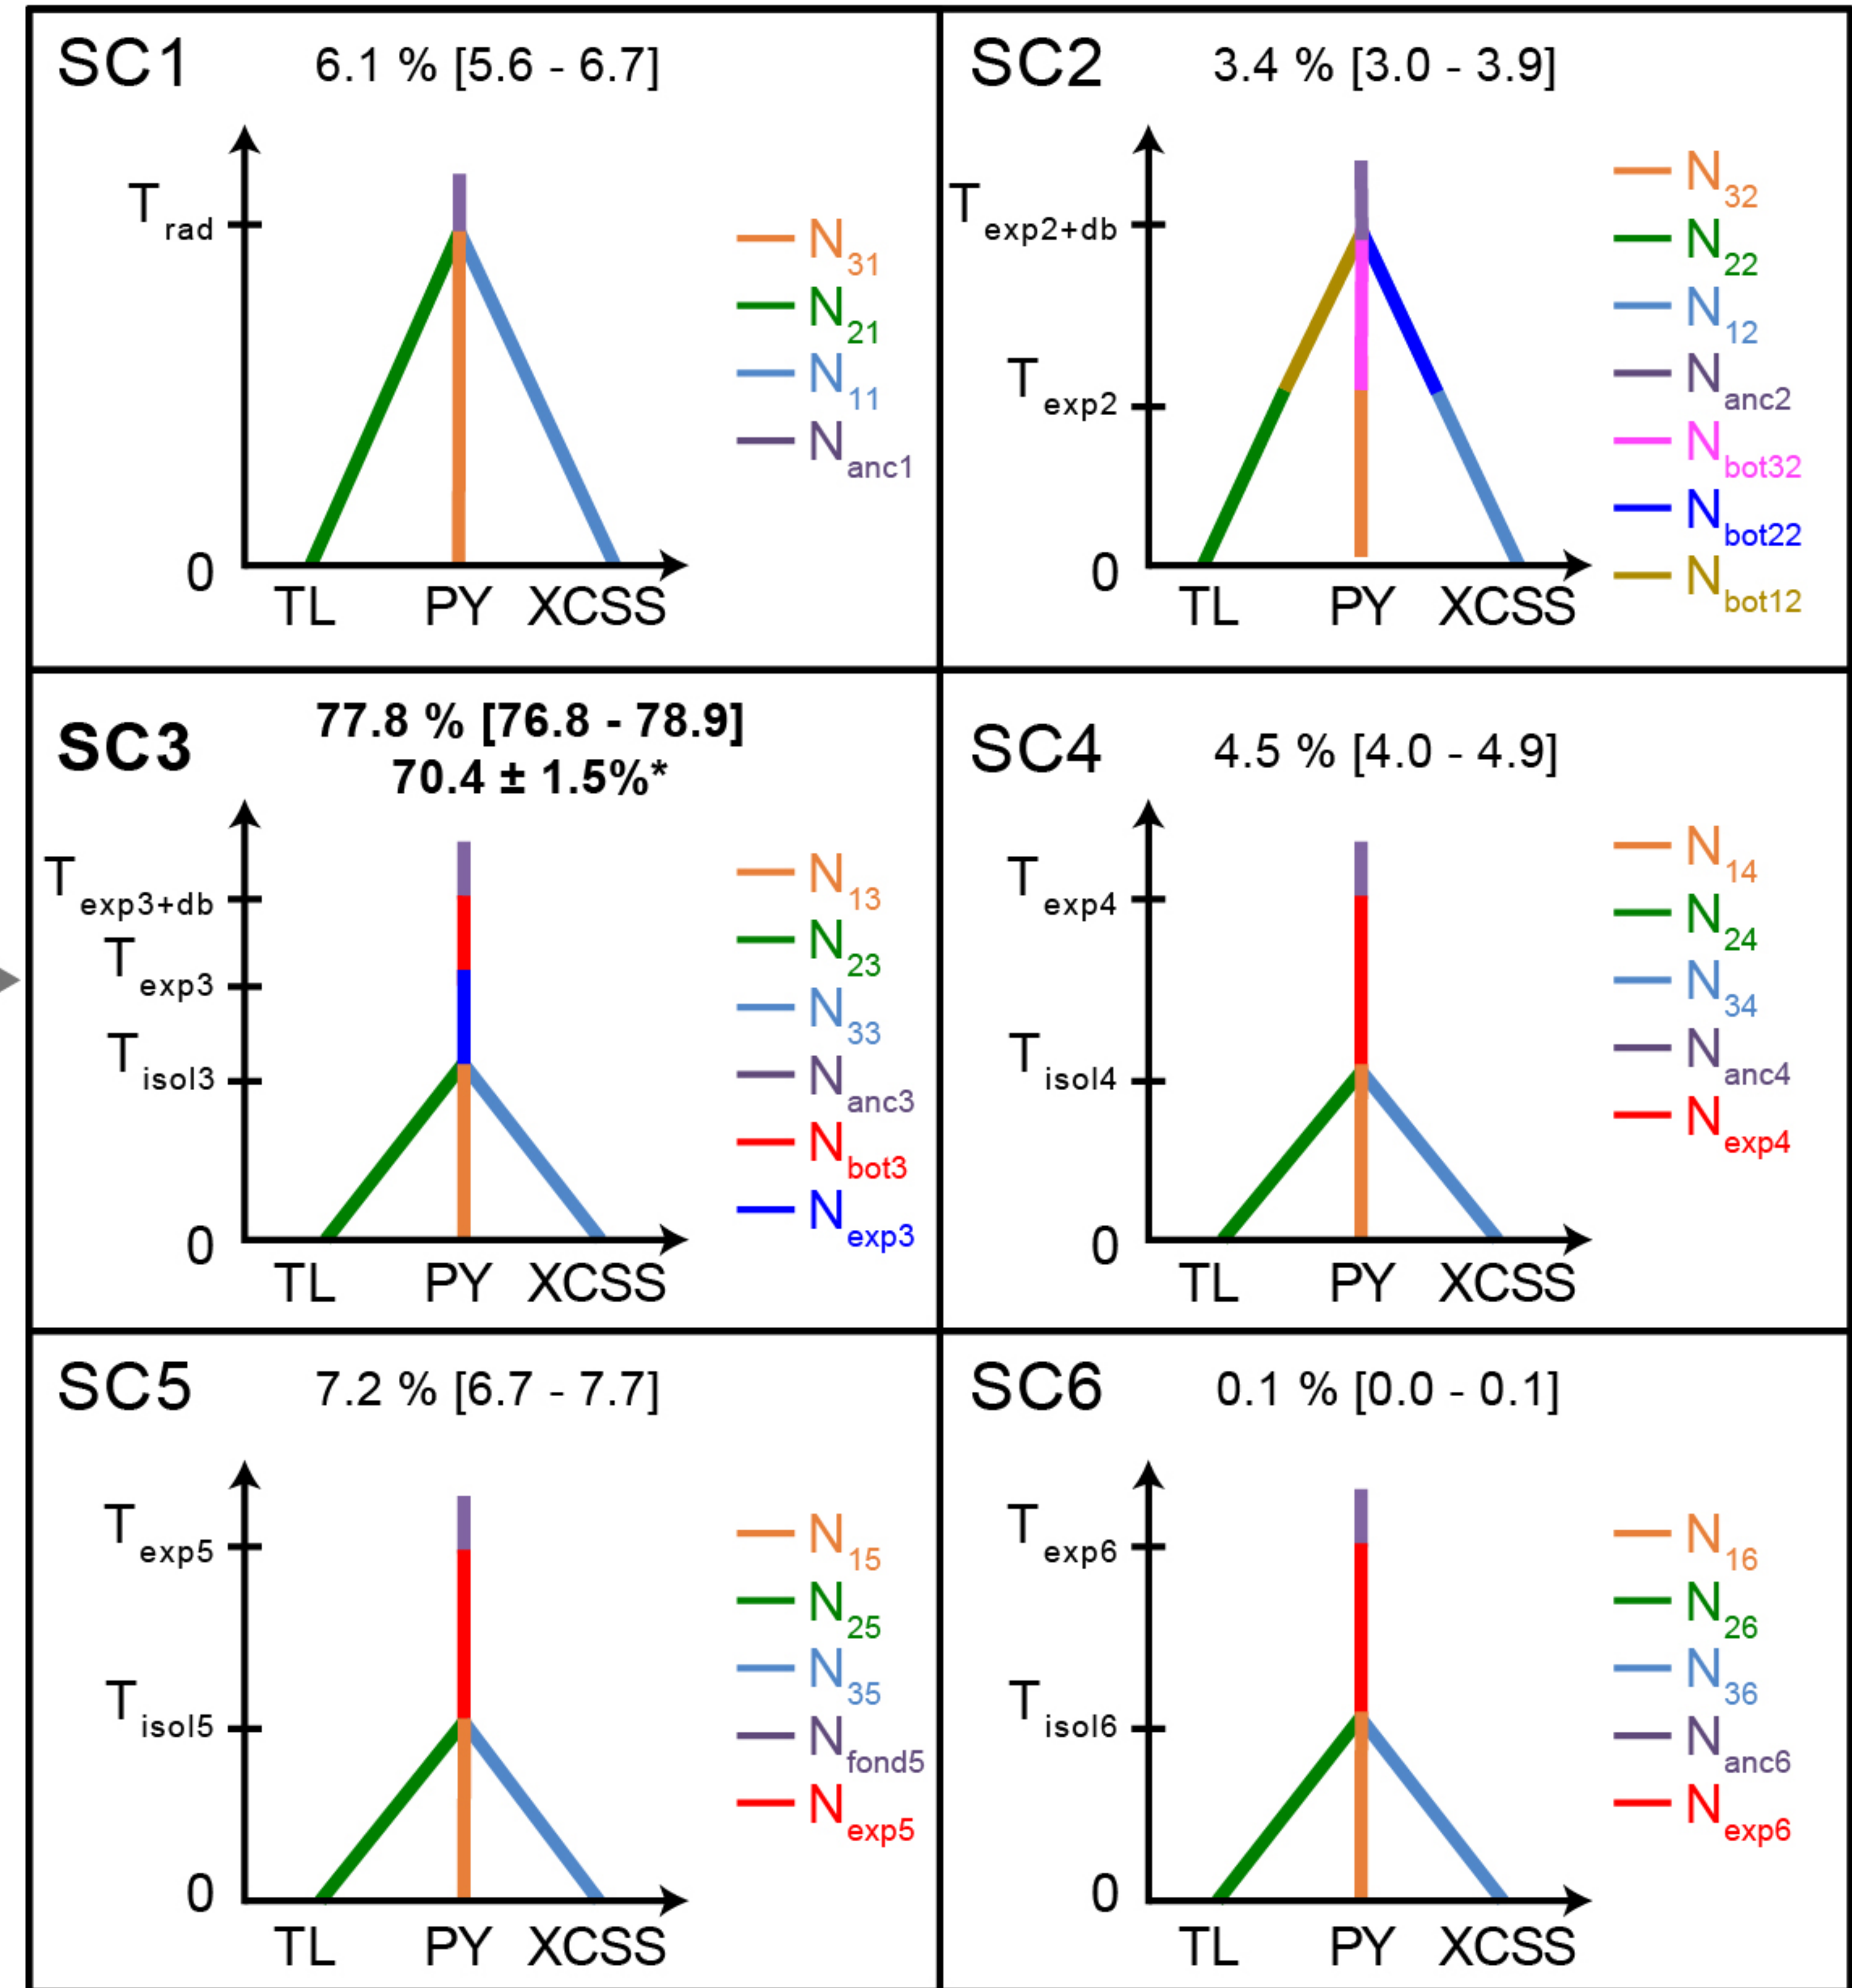

## (ii) Bottleneck + population crash

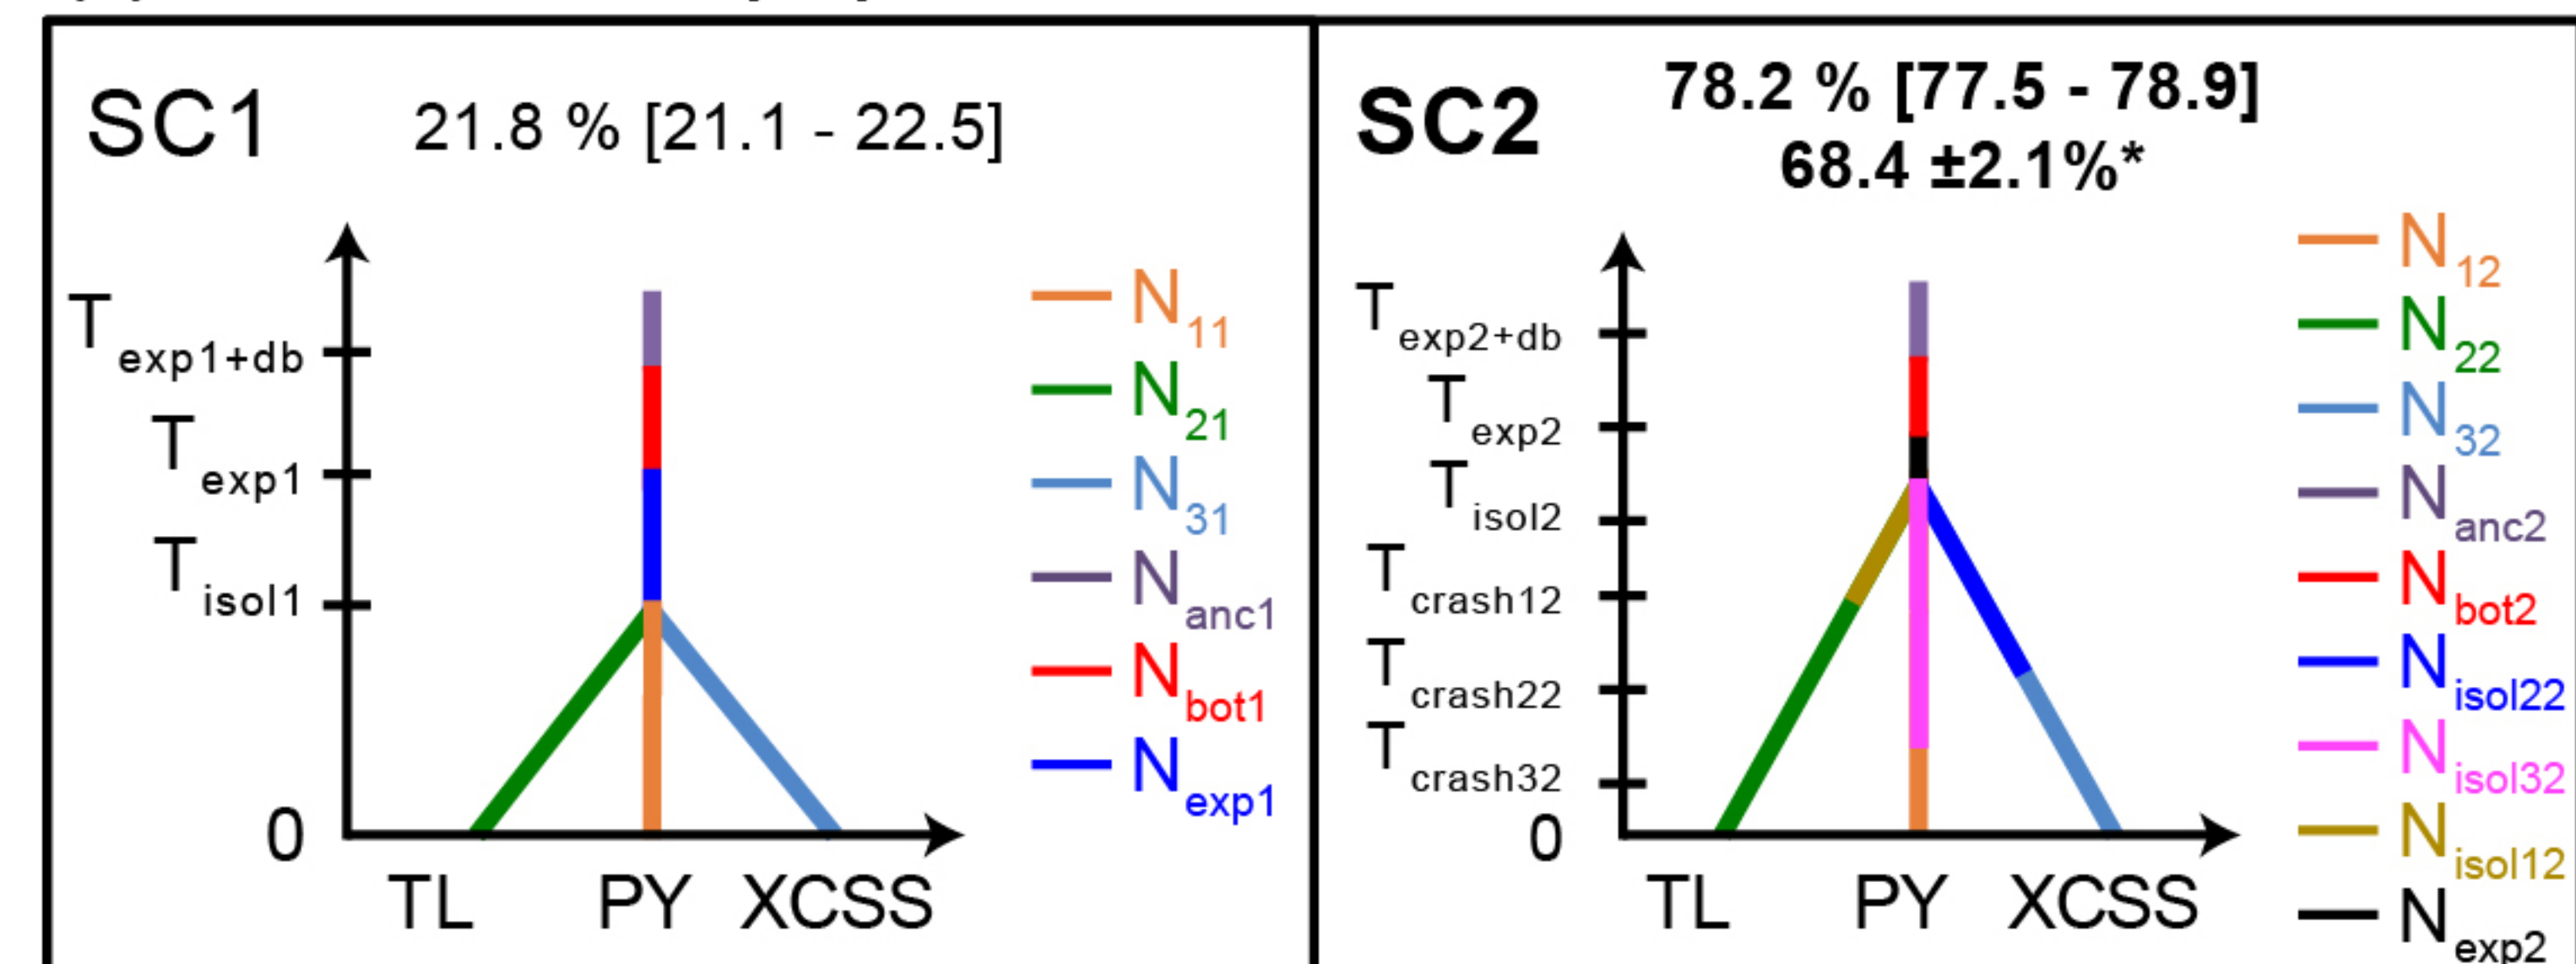

Source: https://www.biorxiv.org/content/10.1101/094995v2.full.pdf
